# Supplementary material for: Identification of cuproptosis-related subtypes and the development of a prognostic model in glioma
Source: Front Genet. 2023 Mar 1;14:1124439. doi: 10.3389/fgene.2023.1124439 (PMC10014798; doi:10.3389/fgene.2023.1124439)
Supplement: Supplementary file 1 [file Table1.XLSX]

## Sheet: S1
	Sequence (5' -> 3')
NBPF8	F：TCCAGTTGTCTTGAACAGCC
	R：CATCTATCCAGTGAGTCCTG
TSKU	F：GAGTTGTGGGCCTAGGAGAG
	R：TAAGTGGGGAAGGGAAGCAG
AURKB	F：CAGAAGAGCTGCACATTTGACG
	R：CCTTGAGCCCTAAGAGCAGATTT
SLC25A43	F：TGGGCCACATTTCCCAGTG
	R：ACCGGGTTTTGATGAGGTCTG
P2RY6	F：TGGCTCTCACTGTCATCGG
	R：GCCAGGTAGGCTGTCTTGG
STEAP1	F：CCCTTCTACTGGGCACAATACA
	R：GCATGGCAGGAATAGTATGCTTT
CDK4	F：CTGGTGTTTGAGCATGTAGACC
	R：GATCCTTGATCGTTTCGGCTG
RARRES1	F：AAACCCCTTGGAAATAGTCAGC
	R：GGAAAGCCAAATCCCAGATGAG
NOG	F：CCATGCCGAGCGAGATCAAA
	R：TCGGAAATGATGGGGTACTGG
KCNN4	F: CTGCTGCGTCTCTACCTGG
	R: AGGGTGCGTGTTCATGTAAAG
MKX	F：TTCAAGGCAATGCTGAACGG
	R：CTCCCGCTTTGATGACCGAA

## Sheet: S2
Gene	Stat	Pvalue
CDKN2A	116.867	3.06967e-27
ATP7B	24.5723	7.15732e-07
DLST	12.716	0.000362534
PDHA1	6.63539	0.00999724
DLD	6.01856	0.0141562
NFE2L2	2.36183	0.124336
PDHB	2.014	0.155854
FDX1	1.81116	0.178369
GLS	1.32821	0.249123
SLC31A1	1.32395	0.249884
GCSH	1.1955	0.274223
DBT	0.658226	0.417187
MTF1	0.583258	0.445038
DLAT	0.422444	0.51572
ATP7A	0.245654	0.620152
NLRP3	0.171976	0.678361
LIPT1	1.70546e-30	1
LIAS	1.6238e-30	1
LIPT2	6.43898e-31	1

## Sheet: S3
ID	NFE2L2	NLRP3	ATP7B	ATP7A	SLC31A1	FDX1	LIAS	LIPT1	DLD	DLAT	PDHA1	PDHB	MTF1	GLS	CDKN2A	DBT	DLST
TCGA_TCGA-KT-A74X	5.91856	0.841138	1.44166	2.08362	5.22641	4.31075	2.60999	3.0597	5.81972	4.68667	6.12653	5.97619	2.93449	3.49997	3.42683	2.96178	5.84366
TCGA_TCGA-76-4927	6.44479	2.9023	1.0422	2.62974	5.73489	5.20965	2.18604	3.26398	6.67973	5.17325	5.55091	5.88575	4.01088	3.70118	2.12706	3.12747	6.57795
TCGA_TCGA-HT-8013	6.23865	3.75848	1.57087	2.90087	5.11082	4.71587	2.72492	2.77117	6.14404	4.61211	5.60906	5.36424	4.0823	4.09966	2.8508	3.55214	6.04851
TCGA_TCGA-28-5215	6.33996	3.10684	1.4846	3.48261	6.18597	5.16887	2.29287	3.12251	6.03955	5.55184	6.59202	6.05872	4.31801	3.61886	1.28242	3.58541	5.97675
TCGA_TCGA-WY-A858	4.94571	3.33023	1.26654	1.88376	4.03916	3.87817	1.98235	2.7652	4.86341	3.50448	5.35946	4.921	2.75652	3.49941	2.60731	2.65225	4.85476
TCGA_TCGA-06-2559	6.53442	2.59258	1.15875	3.34295	5.96712	5.14434	3.04981	3.88757	6.57177	5.52218	5.688	5.52422	4.10972	5.02649	7.45642	3.74551	6.75069
TCGA_TCGA-FG-A6J3	5.24134	3.02686	0.557988	1.95681	4.14971	5.54642	2.13396	2.84702	5.28767	3.26581	5.95554	5.38404	3.3694	3.27127	6.6824	2.85332	5.57507
TCGA_TCGA-QH-A6CU	5.70658	2.37391	1.32196	1.55551	4.16967	4.60252	2.58224	3.55488	5.66708	3.76882	5.29292	5.30361	2.95959	2.87144	2.31717	2.64755	5.32409
TCGA_TCGA-DU-6393	6.3878	0.897759	2.03017	2.83457	5.3133	4.72924	3.18598	3.62661	5.91291	5.61362	5.88758	5.86321	3.61309	4.04566	2.82752	3.76487	6.41769
TCGA_TCGA-DU-6397	5.98369	1.24559	1.89153	2.37494	4.79809	4.2849	2.76664	3.18551	6.17866	5.02643	6.11314	5.82647	3.26654	3.81517	2.80766	3.1451	5.68528
TCGA_TCGA-DB-A75O	5.90352	3.19814	1.09229	1.82439	4.53146	4.35435	2.51012	3.15397	5.227	3.91623	5.62407	5.28979	3.92712	3.33116	3.19591	3.65586	5.91591
TCGA_TCGA-DB-A64O	6.33471	2.67642	1.1569	2.10554	5.06549	5.27853	2.84721	3.60272	6.9774	4.84586	5.63083	5.77588	3.82134	4.73404	4.05143	3.74063	5.42776
TCGA_TCGA-HT-A74H	5.36665	2.85452	0.957867	1.69964	4.1998	4.47455	2.19441	3.14387	5.2222	3.51222	4.88423	5.04756	3.39334	3.74099	2.22591	3.15508	5.02224
TCGA_TCGA-06-0644	6.43611	2.82021	0.783314	3.00507	6.36798	5.09652	2.07484	3.05822	6.75574	5.47381	5.58744	5.62511	3.47112	4.49663	0.979292	3.31094	5.90831
TCGA_TCGA-WY-A859	5.1449	2.35564	1.70698	1.88627	4.39293	4.54254	2.67041	2.88038	6.02885	4.52481	6.48908	5.85475	3.48302	6.06165	1.80495	3.71438	6.1217
TCGA_TCGA-06-2567	7.00827	3.59182	0.68827	2.70878	5.92948	4.85646	3.15452	3.69641	6.62551	5.41418	5.69192	5.57586	4.2208	3.51738	5.53513	3.74352	6.69279
TCGA_TCGA-06-0158	6.4176	3.49729	1.24935	3.08148	5.52219	4.93952	2.76316	3.4079	5.68468	5.21848	5.47385	5.37304	4.11068	4.31407	1.38262	3.67942	6.44903
TCGA_TCGA-QH-A65S	5.55053	2.96802	1.08732	1.97622	4.08669	4.81493	2.12216	3.26282	5.60913	4.53853	5.28962	5.37505	3.58094	3.60113	3.09863	3.3046	5.61649
TCGA_TCGA-06-5416	5.3076	1.25389	1.40014	2.97672	5.48113	5.29785	2.36943	3.60759	5.77516	5.09262	5.07057	5.14037	3.55005	4.65819	4.83934	3.27895	5.99626
TCGA_TCGA-06-5408	7.00408	2.49747	1.46637	2.47141	5.76985	5.28667	2.49216	3.97084	6.87983	5.3717	6.11788	5.85068	3.90137	4.24327	0.630702	3.63059	6.20726
TCGA_TCGA-QH-A6X3	5.86439	3.01898	1.9447	2.22375	4.88964	4.67366	2.81996	2.91836	6.79504	5.03309	5.99264	5.79917	3.95497	4.17492	0.942724	4.09537	6.09625
TCGA_TCGA-DB-A64P	5.94857	1.73203	1.96675	2.16026	4.98936	4.13826	2.8943	2.8192	6.16412	4.86767	5.72229	5.83974	2.9737	3.86557	2.27993	3.12471	5.97555
TCGA_TCGA-DB-A64S	5.97207	4.80133	1.35499	2.539	4.69047	4.86079	2.8451	3.27803	6.12571	4.63665	5.8254	5.76664	3.57226	4.19636	2.75232	3.57011	6.18529
TCGA_TCGA-DU-8161	6.68028	4.35405	1.45489	2.71712	6.23857	5.12034	2.88623	3.47349	7.49759	5.61365	6.01846	5.98222	4.43774	4.24692	3.03769	4.33704	5.9075
TCGA_TCGA-DH-A66G	6.17718	3.95514	2.34521	2.82506	5.09236	4.7105	2.27249	2.54405	6.274	5.29478	5.88695	5.75175	4.35022	5.99415	2.33982	3.98329	6.17951
TCGA_TCGA-S9-A6U0	6.09196	2.82147	2.1191	2.40157	5.55098	5.00293	2.02075	3.09989	6.36465	4.77725	5.92739	5.56378	3.84567	4.2577	0.888868	3.33337	6.00819
TCGA_TCGA-E1-A7YL	6.68378	2.88196	0.726619	2.63774	5.23892	4.92512	3.23486	3.85036	6.09148	4.59858	5.38731	5.04521	3.94476	4.20509	5.87154	3.62858	6.01121
TCGA_TCGA-HT-A74J	5.54695	3.10815	1.93807	2.06836	4.48784	4.32555	2.64579	2.98096	5.76523	4.18861	6.37049	5.08063	3.90605	4.7628	2.52146	3.80355	5.75761
TCGA_TCGA-EZ-7264	6.16116	1.46915	1.87848	3.31986	5.05622	4.38594	3.52664	3.43323	6.46181	5.41047	6.52947	6.11384	3.55576	4.25204	1.68599	3.24474	5.65662
TCGA_TCGA-QH-A6X4	5.70553	1.6517	1.82831	2.09992	4.72896	4.09212	3.03954	3.27298	5.55546	4.19701	5.92779	5.74963	3.19142	3.39865	0.910925	3.0554	5.05615
TCGA_TCGA-CS-5397	6.36898	3.40449	2.18036	2.93514	5.71585	4.82435	2.32998	2.73093	6.7777	5.47096	5.79389	5.77878	4.24221	5.3807	0.935379	4.25132	6.47309
TCGA_TCGA-TQ-A7RM	5.58356	1.27354	1.39939	3.2758	5.73977	4.711	3.23804	3.53877	6.81879	5.45	7.39934	5.8775	4.82291	4.11273	7.36287	4.20737	6.70242
TCGA_TCGA-12-5295	5.89149	2.22107	0.71653	1.65075	5.566	5.77905	2.32916	3.67862	6.41606	5.31489	5.58271	6.38378	3.03319	3.05575	1.93742	3.10197	6.00391
TCGA_TCGA-06-2569	5.80368	0.861766	1.53134	3.88187	6.13394	4.13603	2.11094	3.91811	6.29521	5.45831	7.18093	6.10813	3.23615	5.43245	4.40279	3.96188	7.25829
TCGA_TCGA-DU-7304	5.02068	2.717	1.30349	2.07838	4.04464	4.71819	2.13915	3.11917	5.26547	4.47438	5.66822	5.07956	3.52871	4.04655	1.60171	3.47052	5.20512
TCGA_TCGA-P5-A77W	5.65251	1.01627	1.79014	2.04885	4.67948	3.82801	2.69467	3.53511	6.03245	4.72754	6.10516	4.88562	2.93785	4.2236	3.08084	2.69311	5.25575
TCGA_TCGA-HT-A619	5.68624	0.478533	1.79428	2.64352	5.33405	4.67217	2.72932	4.05926	6.88081	4.89424	6.038	5.12568	3.29701	4.63812	1.90668	2.91699	5.89284
TCGA_TCGA-S9-A6UA	6.47334	4.168	1.0375	3.27431	5.37039	4.9112	2.3182	2.87242	5.85479	5.14088	5.62523	5.56341	4.08711	4.3708	1.04337	3.14159	6.11156
TCGA_TCGA-FG-8187	6.06624	3.43943	1.93097	2.28426	4.57565	4.34483	2.53279	3.21881	5.35685	4.39308	5.26631	5.52534	3.79249	3.62412	0.883214	3.23599	5.36788
TCGA_TCGA-IK-7675	6.80596	2.53341	1.87989	2.75366	5.28474	5.19095	2.94794	3.06828	6.13934	5.95078	6.30727	5.67719	4.35252	3.91057	5.12048	4.63146	6.53474
TCGA_TCGA-HT-7858	6.47472	3.38107	1.58157	2.74916	5.07831	4.64316	2.82364	3.63265	5.82351	5.0319	6.15489	5.66716	4.18074	4.12253	3.27688	3.79859	5.77816
TCGA_TCGA-HT-7690	6.41305	3.3128	1.78551	2.60813	5.50564	5.1206	2.67878	3.36165	6.23768	4.93531	6.1075	5.66363	3.95224	4.82431	2.44272	3.86627	6.57197
TCGA_TCGA-S9-A6TW	5.4418	1.00444	1.6162	1.51564	4.99468	4.18898	1.79412	3.00515	5.80477	5.14744	5.97305	5.45357	2.46449	3.52146	2.93996	2.83614	5.99888
TCGA_TCGA-FG-7634	6.54659	3.29881	2.11215	3.4103	5.79193	4.87201	3.03457	2.84656	6.67264	5.7441	6.10692	5.80565	4.21712	4.00757	0.924831	3.65748	6.54064
TCGA_TCGA-CS-5390	6.11072	2.07118	2.01298	2.70982	5.05699	3.83224	2.90905	2.97517	6.08261	5.0815	5.92452	5.7196	3.55572	4.32916	3.38935	3.49314	6.22531
TCGA_TCGA-DB-5278	6.13574	2.28456	2.08156	2.32221	5.37562	4.49802	2.76179	3.12554	6.25283	5.15952	5.79279	6.03518	3.48781	4.7361	0.729424	3.499	6.13134
TCGA_TCGA-06-0238	5.4494	2.32296	1.14825	2.63148	4.70036	4.73361	2.39211	3.60615	5.91601	3.98404	5.41753	5.52101	2.61534	3.92362	6.56371	3.21073	5.95403
TCGA_TCGA-HW-7487	5.96375	2.02128	1.9134	2.20146	4.78207	4.07528	2.72357	3.29696	6.27286	5.20613	6.16792	5.64646	3.58975	5.65355	1.16753	3.7435	5.97644
TCGA_TCGA-HT-7601	6.72226	3.9964	1.6568	3.13126	5.77112	5.39173	2.58501	3.16406	6.17368	5.67217	5.39196	5.7648	4.38655	4.5878	2.924	3.79074	6.29253
TCGA_TCGA-28-5213	6.82431	3.01452	0.62109	2.1798	5.93586	5.81288	2.87607	4.05986	6.47109	4.70918	5.06502	6.05477	3.18079	3.71237	2.86622	3.22394	5.82579
TCGA_TCGA-E1-5302	6.0806	3.20629	1.65279	2.25324	5.17182	4.81809	2.4376	3.22607	6.23701	5.10174	5.66651	5.76675	4.07089	3.89333	4.0594	3.97261	6.27821
TCGA_TCGA-DU-6396	6.40386	4.515	1.57068	3.54715	5.59344	4.53273	2.81198	2.71682	5.82198	4.97425	5.38853	5.19441	4.29069	4.58856	4.14702	4.04347	5.96466
TCGA_TCGA-R8-A6MK	6.25224	1.92516	1.76417	2.00365	5.00211	4.56884	2.7758	3.20611	5.82828	4.82392	5.99819	5.60159	3.22345	4.02358	2.20599	3.08031	5.24457
TCGA_TCGA-FG-8185	6.05043	2.47222	1.71799	1.89901	4.32673	4.3477	2.72322	3.08189	5.64013	4.7796	6.25014	5.65344	3.57847	4.12638	4.05311	3.95699	6.32029
TCGA_TCGA-DU-5847	6.96278	3.67982	1.1548	2.87098	5.92967	5.31338	2.74057	3.93534	6.10855	5.52253	6.02271	5.72169	4.5209	4.08079	1.17398	4.06336	5.77619
TCGA_TCGA-28-2509	6.52633	2.88202	0.893791	3.20604	5.7181	5.03884	2.42965	3.04045	6.46091	5.32529	5.86337	5.72344	4.13714	3.76518	7.98028	3.42232	6.56809
TCGA_TCGA-S9-A7R1	5.90172	1.43831	1.94921	2.00778	4.16292	4.17762	2.65129	2.8623	6.43169	4.43865	5.42161	5.21692	3.03088	4.59595	2.04371	3.2065	5.66394
TCGA_TCGA-RY-A847	5.53337	2.79672	1.54669	1.95234	4.50445	4.43245	2.34991	2.76603	5.55212	4.55134	5.59228	5.26844	3.01196	4.66046	1.8884	2.85216	5.33847
TCGA_TCGA-HT-7694	5.71302	1.61919	1.76303	1.98189	4.86669	4.44985	2.67664	2.86959	6.28789	5.23666	6.1262	5.74977	3.78851	6.30399	1.66461	3.81567	6.01629
TCGA_TCGA-DB-A4XE	5.7466	3.131	1.80809	2.35849	5.44925	4.51926	2.69047	3.09343	6.69774	4.85215	5.69756	5.64173	3.97201	4.65395	3.46496	3.84767	6.17605
TCGA_TCGA-TM-A7C5	5.73293	2.14336	1.834	2.20902	4.65049	3.71788	2.05084	3.43294	5.72211	4.48614	5.85083	5.39527	2.99964	4.00678	3.58447	2.70168	6.00355
TCGA_TCGA-HT-7684	6.24587	2.21666	0.72405	1.29156	4.29647	4.62776	2.10166	2.85555	5.44491	3.69554	5.56238	5.41358	2.96203	2.32806	4.59268	3.24885	5.83936
TCGA_TCGA-S9-A6UB	5.96067	1.93569	1.94839	2.86725	5.10404	4.42079	2.6183	3.55187	6.28935	4.93943	6.29865	6.03805	3.60027	4.0987	4.23772	3.36378	6.50728
TCGA_TCGA-E1-A7YK	6.06979	3.09739	0.826792	2.31974	4.45125	4.38199	2.60256	3.44202	5.44195	4.06125	4.95234	5.27032	4.1746	3.95713	4.54993	3.27128	5.86518
TCGA_TCGA-HT-8104	6.79253	2.72846	1.68135	2.96644	6.46324	5.12331	2.86732	3.34085	7.28163	5.77611	6.15241	6.20851	4.53965	4.57946	1.27879	4.34274	6.70953
TCGA_TCGA-DU-A6S6	5.01523	1.79059	2.14433	1.7381	4.50353	4.00202	2.57679	3.00339	5.96473	4.71992	5.86097	5.57784	3.24265	4.99849	2.52038	3.11876	5.88521
TCGA_TCGA-S9-A6WG	5.83697	3.44544	1.41238	2.29607	4.45927	4.26881	2.28483	2.78697	5.43686	4.07138	5.48157	4.94423	3.69658	4.55178	2.88016	2.9248	5.95423
TCGA_TCGA-DU-7298	6.6583	3.48432	1.57271	3.07277	5.76913	4.84864	2.9858	3.40998	6.33183	5.49472	6.56991	6.02423	4.43141	4.81386	4.09031	4.35182	6.02523
TCGA_TCGA-HT-A61B	5.84241	4.18943	1.4022	2.52395	5.43797	4.87784	2.87479	3.59416	5.98918	4.20686	5.6909	5.39929	3.84226	4.06457	3.64993	3.29899	6.28189
TCGA_TCGA-RY-A843	5.30129	2.37816	2.00092	1.75416	4.4887	4.41948	2.35804	2.8093	6.22696	4.93134	5.93171	5.78134	3.67767	4.63089	1.03004	3.68105	6.07077
TCGA_TCGA-26-5136	6.11128	2.69355	0.977037	2.64384	5.42059	4.89519	2.88242	3.96123	6.33906	5.04655	5.95945	5.83322	3.68519	4.34088	6.55619	3.44892	5.84106
TCGA_TCGA-HT-7693	6.4149	3.17516	1.99555	2.98169	5.37806	5.58242	3.22241	4.20876	6.73152	5.66516	5.99349	5.63774	4.53551	4.63008	4.05794	4.06677	6.41594
TCGA_TCGA-06-5414	6.85451	3.29212	1.05819	2.64409	5.85593	5.42326	2.42826	3.47453	6.56346	5.61074	5.39857	5.77635	3.9893	3.83871	1.33728	3.55676	6.61066
TCGA_TCGA-06-0138	5.92905	2.90081	0.796243	2.05471	5.40786	5.15364	2.79831	3.77017	5.79831	4.333	4.86257	5.60142	2.65341	3.59051	6.44022	3.46884	5.64398
TCGA_TCGA-QH-A65Z	6.14501	1.86732	1.28034	2.10716	4.69954	4.70787	2.95744	3.54426	6.02244	4.56666	5.9088	5.68689	3.18122	4.11455	3.43551	2.96518	5.90926
TCGA_TCGA-HT-7603	5.82501	2.1342	1.32817	1.83877	4.27851	5.09663	2.65684	3.07865	6.45495	5.06833	6.42998	5.92739	3.14954	6.37685	2.28099	3.65855	5.46042
TCGA_TCGA-RY-A83Y	5.48958	1.1667	1.59853	1.83092	4.55796	4.31965	2.97967	3.49358	6.08732	3.83977	6.18354	5.76656	2.80678	3.57119	2.61448	2.5255	5.95976
TCGA_TCGA-S9-A6TU	5.1522	4.0127	1.63631	1.3268	3.93143	3.77405	1.94515	3.10267	4.78783	4.02783	5.48599	5.13804	3.68816	3.73492	2.95717	3.2774	5.63002
TCGA_TCGA-E1-A7Z6	6.6141	2.75588	1.88324	2.19425	4.60612	4.92074	3.0306	3.43345	6.05441	4.86554	5.73463	5.60608	4.45492	3.96171	1.89961	3.95946	6.13052
TCGA_TCGA-DH-5141	5.72973	1.11671	1.61661	1.44611	4.7085	4.20619	2.13296	2.94796	5.9992	4.70641	5.846	5.45899	2.82341	2.78815	3.5718	2.87004	6.08735
TCGA_TCGA-HW-8319	6.04539	3.30971	2.00429	2.71291	5.70776	5.04654	2.62303	3.13108	5.96324	5.39652	5.70628	5.66083	4.31986	5.15347	2.51753	4.13183	6.01865
TCGA_TCGA-CS-4941	6.61371	3.32527	1.48226	2.48276	5.97414	4.8848	2.40862	3.51053	6.99685	5.72089	6.13207	5.96453	4.98051	4.27817	5.64179	4.51362	5.90807
TCGA_TCGA-28-1747	6.36777	3.78654	1.12646	2.30164	5.72227	5.04003	2.59594	3.2819	6.50397	4.91059	5.9132	5.8639	3.51427	4.07553	1.59624	3.55981	6.50226
TCGA_TCGA-06-0156	6.14109	3.26282	1.38136	3.06004	6.07728	5.34516	2.72716	4.07326	6.22946	5.29299	5.38427	5.62468	3.68078	4.25633	1.10078	3.41442	5.89708
TCGA_TCGA-TQ-A7RK	5.79281	2.74556	1.61125	2.75725	4.72401	4.47473	3.00258	3.25597	5.88797	4.71985	5.74184	5.61933	4.13419	4.27989	3.70245	3.69413	6.37013
TCGA_TCGA-32-5222	6.197	2.88471	0.83229	2.29851	5.78515	4.79152	2.82296	3.93148	6.39106	4.65999	5.58935	6.02406	3.2925	4.56543	1.51592	3.96226	6.45532
TCGA_TCGA-DU-6404	5.44816	2.1343	3.21667	3.10763	5.23334	4.73849	2.71665	2.96687	6.47014	5.03254	6.88997	5.44102	3.88945	4.80953	3.09803	3.54147	6.55595
TCGA_TCGA-S9-A7R7	6.62003	3.57038	1.44799	3.62318	5.35881	5.0834	2.51162	2.93224	6.23331	5.2874	5.31698	5.77312	4.50761	4.72227	4.78673	3.9509	6.16878
TCGA_TCGA-28-5208	6.55983	3.47503	1.17213	2.93746	5.73712	5.66548	2.70143	3.50485	6.50943	5.56859	5.87107	6.12301	3.58433	4.51634	1.31769	3.73816	6.70103
TCGA_TCGA-26-5133	6.74786	1.50273	1.10826	2.50015	5.9385	5.70247	2.6325	4.00392	5.95397	5.62895	6.40922	5.49089	3.96846	4.24664	7.82952	3.59213	6.23007
TCGA_TCGA-S9-A6TX	5.75542	1.76795	2.08668	1.91576	4.48475	4.04614	2.67911	3.18096	5.59987	4.36659	5.90032	5.41024	2.91886	3.27186	2.97814	2.96885	5.73054
TCGA_TCGA-HT-8018	5.75926	3.68942	2.41125	2.4697	4.98755	4.36284	2.44745	2.64281	6.30312	4.92561	6.04684	5.81556	3.73992	6.41583	2.53158	3.73135	6.11785
TCGA_TCGA-06-2563	6.1214	2.36445	1.7031	2.70996	5.94292	4.75385	2.97156	3.81312	6.75238	5.74287	5.88624	5.91053	3.49784	4.90435	0.744742	3.62217	7.3952
TCGA_TCGA-TQ-A7RG	5.77987	1.70605	2.20533	2.38642	5.07364	4.60745	3.02628	3.24715	6.12097	4.73776	5.92711	5.92147	3.45102	3.68827	4.75804	3.37119	6.14141
TCGA_TCGA-DB-A4XA	5.71152	1.723	1.65471	1.81929	4.59671	4.24013	2.52037	3.32398	5.78024	4.34607	5.66879	5.5942	2.8841	3.9983	1.97388	2.79377	5.57434
TCGA_TCGA-TM-A84I	5.90553	2.42151	1.72255	3.11577	5.2575	5.07168	2.71535	4.03401	6.12861	5.10135	6.00951	5.78531	4.58127	4.22337	7.08315	4.51798	6.11407
TCGA_TCGA-S9-A7IY	6.12758	3.23102	1.58266	2.32332	5.07852	4.52236	2.53345	3.21855	5.78873	4.63971	5.77945	5.62089	3.5054	3.93084	1.34889	3.19035	5.93237
TCGA_TCGA-19-0957	6.28815	2.68532	1.09128	3.13583	4.81537	4.51961	2.11009	3.15187	5.8109	4.60472	5.44311	5.34001	4.35691	3.88298	5.05076	3.62442	5.84738
TCGA_TCGA-DB-5275	6.23095	2.85245	1.41354	2.36511	5.3563	4.53121	2.96014	3.61846	6.2233	4.81309	6.07153	5.14073	4.34726	4.3287	3.89997	4.03522	6.45964
TCGA_TCGA-DU-7011	5.80359	3.23523	1.319	2.29217	4.612	4.51138	2.06662	2.73641	5.92051	4.58259	5.29172	5.26963	3.61842	4.13931	2.51617	3.70486	5.61498
TCGA_TCGA-06-2557	6.20529	3.82707	1.47424	2.97362	5.54499	4.90072	2.67135	3.46438	5.8886	4.80768	5.81418	5.60406	3.9892	4.41841	5.43463	3.92747	6.42198
TCGA_TCGA-RY-A83Z	5.44227	2.44443	0.710163	1.9416	4.50637	5.12466	2.84284	3.86051	5.3864	3.53774	5.8733	5.66975	3.55562	3.91197	3.41602	3.45195	5.52829
TCGA_TCGA-S9-A7IS	6.26237	2.12945	1.32838	3.07512	5.73567	5.00452	2.17428	2.9186	6.20503	5.20032	6.34216	5.88815	3.97152	5.37675	1.6698	3.60216	6.55976
TCGA_TCGA-FG-A4MU	7.00821	3.66872	1.77278	3.1296	5.62395	4.97347	2.72235	3.36331	6.39604	5.27372	5.84647	5.5065	4.11953	4.72526	1.37475	3.65676	6.54097
TCGA_TCGA-76-4932	6.64709	2.70263	1.27394	2.13248	5.32411	5.05372	2.31371	3.52463	6.38511	5.21258	5.78169	5.99438	4.10938	3.529	1.15433	3.72496	6.88501
TCGA_TCGA-CS-6667	5.80682	2.09635	2.14504	1.22578	4.35911	4.23497	2.76199	3.04644	5.82475	4.88559	5.96552	5.39542	3.72405	4.15588	2.67008	4.20162	6.15005
TCGA_TCGA-R8-A6MO	5.95084	2.05956	2.00581	2.2123	4.41405	4.45415	2.9564	3.34065	5.79209	4.21162	5.87775	5.93054	3.34665	3.51588	2.40982	3.2039	5.93307
TCGA_TCGA-FG-A4MT	5.39337	3.27463	1.90999	2.02568	4.68264	4.62287	2.52089	2.72589	5.99742	4.44459	6.06798	5.86268	3.49861	4.92444	2.03673	3.63652	5.33055
TCGA_TCGA-06-5858	6.69969	2.93559	1.26744	4.03388	6.05467	5.10235	2.49297	3.47125	6.80017	5.38629	6.40651	5.51609	4.28295	3.90954	6.52671	3.67233	6.56877
TCGA_TCGA-TM-A7CF	5.56101	1.95603	1.40819	2.03384	4.1724	3.82173	2.4504	2.93196	5.38231	4.31105	5.78029	5.54707	3.96886	4.42052	2.87505	3.75616	5.44764
TCGA_TCGA-DH-A66D	6.37637	3.67063	1.51437	2.60466	4.81371	4.6373	2.70164	3.06944	6.22073	4.92804	5.69454	4.90978	4.153	4.30733	3.7423	3.7521	6.4607
TCGA_TCGA-28-2513	6.22657	3.48119	0.820269	2.52385	5.16941	5.22444	2.08112	3.04337	6.29158	4.92985	4.93848	5.5139	3.26689	3.88749	1.77933	2.9335	6.1639
TCGA_TCGA-FG-6689	6.18258	3.28999	1.55005	2.13911	4.44647	4.39686	2.60689	3.25871	5.81453	4.61057	5.65597	5.68693	4.05311	5.06365	2.20474	3.9191	5.90046
TCGA_TCGA-HT-7902	6.30725	2.48607	1.5152	2.66544	4.67839	4.30832	2.75925	3.31263	5.859	4.78662	5.52169	5.69324	4.55919	4.17897	2.59128	3.82578	5.76184
TCGA_TCGA-19-1787	6.23869	2.74593	0.905817	3.25705	5.33543	5.72363	2.36729	2.96877	6.88009	5.44751	6.53443	5.28385	4.03245	3.48396	7.19072	3.82994	6.75449
TCGA_TCGA-DU-5870	5.72735	2.4249	2.02297	2.07762	5.55684	4.57791	2.72977	3.15362	6.13677	5.28445	6.01288	5.75287	3.28158	3.43983	3.48241	3.17535	5.68816
TCGA_TCGA-DU-5874	6.00315	1.08333	1.96628	2.8785	5.40975	4.41652	2.91483	3.22878	6.28144	5.18565	5.83138	6.11088	3.53636	4.13124	1.94321	3.27596	6.17867
TCGA_TCGA-DB-5270	5.77219	3.25544	1.25314	1.94582	4.7805	4.33047	2.3454	2.83454	6.21665	5.09239	5.71137	5.62908	3.83161	5.76492	2.24479	3.81434	5.92308
TCGA_TCGA-E1-5311	6.3232	1.5058	2.67924	2.51263	5.38795	4.16107	3.01403	3.26505	6.23641	5.31017	6.1548	5.7693	3.63564	5.06907	3.23425	4.13314	6.45125
TCGA_TCGA-DH-5140	6.89106	1.8654	2.14752	2.71777	5.56716	4.98515	2.66458	3.63371	5.93767	4.9297	5.7381	5.88962	4.3659	4.51886	4.96024	4.15053	5.63934
TCGA_TCGA-16-1045	6.22742	3.06412	1.16012	2.99729	5.72493	4.95585	2.81372	3.64718	6.63781	5.03962	5.73827	5.5251	3.733	4.14939	1.31547	3.55433	6.04378
TCGA_TCGA-FG-7643	5.52101	3.09768	1.53159	2.05677	5.1269	4.31789	2.08238	2.35912	6.57292	5.12198	5.71926	5.78322	4.11357	5.71645	1.48715	3.58763	5.58607
TCGA_TCGA-27-2519	6.20098	2.20165	0.933419	2.25765	5.78459	5.22429	2.49397	3.5079	6.01764	4.7754	5.42692	5.56812	3.83813	3.70037	6.34143	3.26188	5.33396
TCGA_TCGA-32-2615	6.0423	2.89698	1.63801	2.63921	5.39329	4.73294	2.79646	3.87003	5.73838	4.66528	5.61791	5.1879	4.05495	3.70203	3.59503	3.2864	5.86046
TCGA_TCGA-DU-7013	6.58627	2.65341	1.89844	3.22816	5.91905	4.79715	2.95249	3.37177	6.80153	5.66546	5.76743	5.47336	4.97876	4.48919	6.29782	4.36201	6.4704
TCGA_TCGA-HT-8110	6.30564	4.87372	1.40117	2.61989	5.74079	5.02812	2.52526	3.29709	6.41683	5.11842	5.33027	5.42782	4.22505	4.3182	1.46053	3.62548	5.49954
TCGA_TCGA-HT-7687	6.08174	2.61319	2.61106	2.89755	5.03372	4.23004	2.86705	2.97036	6.36147	5.15631	5.98919	6.04212	3.70552	4.8789	2.95986	3.33994	6.18784
TCGA_TCGA-RY-A840	5.37373	1.08224	1.41585	1.71455	5.34358	5.04201	2.61471	3.53381	6.29912	4.91196	6.44928	5.8496	3.10496	3.21507	3.53911	2.65753	5.11333
TCGA_TCGA-P5-A5F6	4.88896	0.929175	3.55966	2.16891	5.87041	4.27868	2.5208	1.96369	7.03122	4.53856	6.7302	5.33185	3.51335	3.26682	1.07454	4.02927	7.04483
TCGA_TCGA-41-4097	6.32219	2.88567	1.41823	2.83291	5.22856	5.01115	2.69413	3.40424	6.1891	5.25213	5.7141	5.6299	3.7215	4.72767	1.57678	3.44725	5.90857
TCGA_TCGA-TQ-A7RV	5.55364	3.70311	1.99274	1.83645	4.379	4.68672	2.6702	3.16818	5.72477	4.71407	5.64151	5.49378	3.91283	4.56701	3.9819	3.69301	5.88118
TCGA_TCGA-DU-6542	6.25637	3.68442	1.82692	3.25306	5.30061	4.51538	2.87338	3.36759	6.32562	5.21511	5.60614	5.72041	4.34339	5.04569	2.9889	4.23054	5.96684
TCGA_TCGA-HT-7472	6.45566	3.63229	1.8916	3.17669	5.48243	4.94364	2.68348	3.17987	6.33433	5.22801	5.73012	5.83782	4.51811	3.90443	0.856263	4.1451	6.14867
TCGA_TCGA-19-1389	6.86085	3.38964	0.583003	2.84874	4.98956	5.48542	1.5213	3.24237	5.87442	5.22477	5.41411	5.41526	4.0538	4.40206	5.43305	2.86667	5.42007
TCGA_TCGA-CS-6669	4.46688	1.44726	1.32968	1.44317	3.88672	3.52262	2.10124	1.76589	5.67581	4.82429	5.68645	5.23739	3.05443	6.36382	0.344857	3.68777	5.25158
TCGA_TCGA-HT-7602	5.93238	3.16494	1.43113	2.03832	4.43918	4.50496	2.57193	3.04648	5.835	4.53332	5.47862	5.75744	4.04265	3.3319	1.80952	3.81032	5.718
TCGA_TCGA-HT-7474	5.69818	2.00828	1.47273	1.8795	4.74927	4.4998	2.37464	2.9194	6.1615	5.08683	5.84944	5.81178	4.03774	5.69242	3.32502	3.77864	5.94509
TCGA_TCGA-DH-A7UV	6.03014	2.93722	1.6982	2.14009	4.3963	4.30663	2.97148	3.53492	5.90429	4.29765	6.3546	5.33966	4.08613	3.67254	5.27551	3.88004	5.97234
TCGA_TCGA-P5-A5EY	5.86582	2.26722	1.23671	1.55624	4.2124	4.30309	1.94185	2.55707	5.61584	4.40216	5.41761	5.17511	3.40641	4.52973	1.76016	3.51541	5.4607
TCGA_TCGA-E1-A7YO	6.09348	1.45542	2.26886	2.58389	5.20851	4.20441	3.42038	3.4925	6.1752	5.00554	5.77215	5.65589	3.37769	4.80964	2.74547	3.27414	6.12693
TCGA_TCGA-FG-6691	5.98082	5.11098	1.86581	2.91512	5.22626	4.7247	2.49951	3.12165	6.68357	5.17392	5.72311	5.57577	4.45846	3.04941	2.96204	4.17618	6.25364
TCGA_TCGA-TQ-A8XE	5.83639	3.14248	2.24419	2.41698	5.07278	4.72095	2.75754	3.16205	6.34205	4.77319	6.31669	5.90977	4.19516	4.28012	3.60088	4.12162	6.02829
TCGA_TCGA-HT-7882	7.26643	4.14723	1.04203	3.32983	6.27493	4.92823	1.83738	2.89309	6.2494	5.18657	5.31299	5.458	4.4604	4.9766	2.22724	3.25298	6.15697
TCGA_TCGA-28-5218	6.42551	2.55942	1.31726	3.75315	5.75729	4.0214	2.03282	3.21962	6.69198	4.4844	5.91321	5.46395	3.3565	4.54748	1.01204	3.19175	6.16885
TCGA_TCGA-27-1837	5.94375	2.99505	1.29733	2.26549	5.189	4.67359	1.62202	3.09998	6.24485	4.83811	5.59578	5.53385	3.60058	3.85514	1.83706	3.2451	6.3246
TCGA_TCGA-P5-A5ET	5.87432	1.73701	1.85154	1.99207	4.84756	4.44972	2.95079	3.2106	5.8606	4.43168	5.80593	5.69042	3.17649	4.17964	1.60608	3.19458	5.95384
TCGA_TCGA-06-5413	6.55832	2.93462	1.29976	2.56974	6.23064	5.80271	2.79134	4.078	6.99338	5.38998	5.90844	6.20733	3.41498	4.47585	1.18082	3.8092	6.88088
TCGA_TCGA-DU-7018	5.97786	1.19439	1.96116	2.58335	5.43915	4.28388	2.28815	2.9545	6.20584	5.71351	6.34361	5.74035	3.38587	3.98383	3.20167	3.15394	6.35271
TCGA_TCGA-76-4928	6.37062	2.3507	1.24251	2.53724	5.23451	5.26209	1.7547	3.60259	6.39422	4.96103	5.50167	5.96765	3.32418	4.42233	1.38021	3.01399	6.44553
TCGA_TCGA-FG-7638	5.60699	1.62155	1.52667	1.75215	4.91302	4.11438	2.07792	2.66266	5.86335	4.66851	5.75051	5.50573	3.06115	4.19425	2.67721	3.0919	5.71107
TCGA_TCGA-DB-A64R	5.81643	2.06834	2.13999	2.51745	4.97828	4.51615	3.35605	3.3504	6.18314	4.67873	5.98912	5.86765	3.27767	4.40796	0.861503	3.41501	6.1932
TCGA_TCGA-TQ-A7RF	6.16186	2.65272	2.03614	2.15533	4.21846	5.09341	3.16572	3.94753	5.97337	4.60079	6.08112	5.93195	4.28302	4.28365	4.95895	4.07362	5.4994
TCGA_TCGA-DU-6407	6.16558	3.10494	1.37378	2.62398	5.30229	5.05647	2.75371	3.20656	6.38075	5.0584	5.70434	5.4836	4.29516	4.22026	4.77231	3.76732	6.27974
TCGA_TCGA-27-1835	5.88382	0.820868	1.35796	1.86806	5.09652	4.28789	2.69235	3.55154	6.32228	4.83096	6.03148	5.7104	3.42153	3.66293	6.07807	3.16632	5.45747
TCGA_TCGA-HT-7874	5.65895	2.09363	2.11704	2.21141	4.94238	4.2993	2.67038	2.62458	6.32565	5.41123	5.99261	5.88452	3.85439	6.15205	0.925414	4.04835	5.95648
TCGA_TCGA-WY-A85A	5.51741	2.73854	1.26766	2.25451	4.26295	4.58574	2.40968	2.91872	5.71197	4.32225	5.59107	5.54599	3.6331	3.90735	2.52792	3.72895	5.93159
TCGA_TCGA-15-1444	6.23108	3.94924	1.58625	2.99253	5.16568	5.17057	2.58714	3.38879	6.07013	5.25398	5.93819	5.96909	4.33866	3.94429	3.64789	3.87994	6.37487
TCGA_TCGA-E1-5318	6.20116	1.52275	1.68403	2.61361	5.37874	4.09098	2.46844	3.234	6.17106	5.17887	6.03708	5.84396	3.63491	3.9229	0.724441	3.08467	6.56135
TCGA_TCGA-HT-A74O	5.32907	2.51416	0.750289	1.65579	3.90419	4.35976	2.17473	2.79488	5.51336	3.43614	4.94113	5.39244	3.1913	3.55557	3.46245	2.92978	5.39524
TCGA_TCGA-06-0747	7.23265	2.00172	1.66875	2.48721	5.31551	4.72608	3.02975	3.65394	6.34744	4.7573	5.7249	5.8281	3.83724	4.51822	0.853899	3.37028	7.18692
TCGA_TCGA-CS-5394	6.11014	0.831849	2.28305	2.40492	5.72678	4.27637	2.5918	3.29019	6.79184	5.71908	6.24501	5.85293	3.64563	3.45184	1.94044	3.94339	6.56067
TCGA_TCGA-P5-A5EW	6.62868	3.29095	1.64633	2.81466	5.08719	5.06958	2.58958	3.04243	6.29566	5.03137	5.75985	5.80561	4.46606	3.53829	0.944862	4.53438	6.30627
TCGA_TCGA-VV-A829	6.75991	2.7601	1.71932	2.8426	4.93445	4.58439	3.67188	3.5806	5.87649	4.79598	6.06638	4.67351	3.30411	3.99745	3.50152	3.92034	5.31047
TCGA_TCGA-28-1753	5.87665	3.33371	1.0964	2.71064	5.66239	4.96909	2.0405	3.27986	6.34045	4.9275	5.67972	5.64855	3.57851	4.01737	2.12086	2.95241	6.28484
TCGA_TCGA-HT-7677	6.33398	2.27661	2.08297	3.23032	5.78338	4.52048	2.93076	3.76235	6.42331	5.29063	5.72452	6.12814	4.0707	3.96727	3.86223	3.50031	6.30238
TCGA_TCGA-DB-5279	6.51946	2.38345	2.55319	2.56875	5.14216	4.59421	2.44704	3.86738	6.51553	5.58114	6.02316	6.03949	4.02587	5.14633	1.02515	3.47534	5.78409
TCGA_TCGA-HT-8563	6.86439	3.77998	1.31936	4.29336	5.60527	4.96293	2.74571	3.31861	6.27215	5.37271	5.403	5.51589	4.55098	5.17997	4.57929	4.01844	5.73717
TCGA_TCGA-06-0219	5.48664	1.58421	0.539103	1.6433	5.93412	5.01595	2.89709	4.52602	5.42663	4.40048	4.54021	6.10549	1.92875	3.707	1.93962	3.04963	5.77469
TCGA_TCGA-HT-7686	6.61254	4.17537	1.3024	3.06843	5.43991	4.768	2.53937	3.3679	6.31243	5.00458	5.30192	6.0416	4.61022	4.21932	3.53454	4.16377	6.52785
TCGA_TCGA-E1-5304	6.60442	1.65004	1.17165	2.99192	5.37903	5.51117	2.86453	4.10581	6.29074	5.33133	7.46423	5.15817	4.59547	4.32692	1.79532	4.19512	6.2424
TCGA_TCGA-S9-A6WO	5.84436	3.69755	1.78045	2.768	4.47695	4.55584	2.79473	3.35922	6.18278	4.70307	6.14043	5.57447	4.25862	4.00347	4.0777	3.94308	6.04911
TCGA_TCGA-HT-A5RB	5.56751	2.05126	1.84495	2.46042	4.5377	4.39838	2.67005	3.20514	5.69409	4.66452	5.60907	5.5247	3.72454	5.00632	1.64677	3.78422	5.78591
TCGA_TCGA-HT-7616	6.2493	1.94969	1.8264	2.84072	5.23398	4.35963	3.02461	3.10154	6.4138	5.52807	5.78236	5.42949	3.74986	4.50449	2.76098	3.54652	5.8512
TCGA_TCGA-HT-7483	6.14383	2.4892	1.34826	2.47163	5.29373	4.51662	2.51554	2.96215	6.30426	5.19324	6.22879	5.60504	3.82461	4.70323	1.44818	4.31585	6.44774
TCGA_TCGA-QH-A6XC	5.56499	2.92437	1.30671	1.36847	4.70079	4.49648	2.27495	2.80951	6.09418	4.27347	5.98952	5.50156	3.09041	4.67287	0.923747	3.15396	5.75625
TCGA_TCGA-FG-A6J1	4.92181	2.57409	1.20488	1.53255	4.08097	4.51653	2.6292	3.11985	5.7479	3.01174	5.97018	5.70805	2.5398	3.5347	4.32376	2.34328	5.78493
TCGA_TCGA-F6-A8O3	5.93848	1.35994	2.13699	2.41938	5.65297	4.73212	2.4032	3.49972	6.45207	5.18678	6.47836	6.19165	3.48983	4.47118	3.64274	3.43422	6.56803
TCGA_TCGA-DB-A75P	5.29004	2.19094	1.3739	1.3114	3.96002	4.13071	1.78916	2.34904	5.14142	4.12685	5.34892	5.13137	3.3014	4.38305	2.08765	2.92491	5.38144
TCGA_TCGA-VM-A8C8	5.69233	2.98731	1.54313	1.72192	4.54931	5.40612	2.97454	3.96599	6.11293	4.52905	5.72298	5.6141	3.96045	3.85824	4.30414	3.64347	6.0188
TCGA_TCGA-S9-A6WM	6.96067	2.67051	0.955201	2.24737	5.4243	4.6448	3.03643	3.74378	6.98263	4.39295	5.61251	6.01351	3.43669	4.46011	0.670639	4.2312	5.85536
TCGA_TCGA-WH-A86K	5.54674	2.16963	1.06882	0.801229	3.52285	4.48607	1.95792	3.01428	5.19963	4.03823	5.94915	5.06417	3.19713	3.70624	4.11762	3.21171	5.35971
TCGA_TCGA-FG-8189	4.57949	2.29921	2.19495	1.7151	4.46688	4.19248	2.77922	2.13675	6.336	5.46428	6.16181	5.85743	3.57201	7.06308	1.26436	3.93591	5.89549
TCGA_TCGA-E1-A7YN	6.59603	3.92878	1.52364	2.63743	5.3764	5.14847	3.04264	3.55941	7.23622	5.19649	5.8854	5.6058	4.25828	4.83252	1.77132	3.97837	6.38152
TCGA_TCGA-HT-A5RA	6.90671	2.73843	1.45873	2.66103	5.88044	6.01518	2.52891	3.24017	7.1303	5.68072	6.23812	5.06191	4.09623	4.52311	2.92214	4.24774	6.60278
TCGA_TCGA-W9-A837	5.68003	2.42538	2.14323	2.09181	4.99892	4.49418	2.80818	2.84025	6.04872	5.03796	5.89709	5.56221	3.64106	5.21765	1.83614	3.47316	5.86697
TCGA_TCGA-CS-6666	6.29528	2.52252	1.69379	2.46032	4.95332	4.44948	2.9563	3.25325	6.02792	5.4701	6.08779	5.7135	4.2823	4.12694	2.80214	4.0434	6.74064
TCGA_TCGA-DU-A6S8	5.98892	1.46637	1.68175	2.44229	4.18371	4.25142	2.53328	3.83014	5.97502	5.06507	6.26339	6.11764	3.03131	4.27281	2.4077	2.91646	5.36226
TCGA_TCGA-06-0749	5.81427	2.28093	1.14127	1.61303	4.89377	4.98943	2.30653	3.93051	5.59835	3.8905	5.42503	5.28326	2.93657	4.17778	2.69369	2.90584	5.82637
TCGA_TCGA-QH-A6CW	5.76394	4.44375	1.65761	2.16764	4.33065	4.75057	2.48366	2.83145	5.54711	4.28827	5.90278	5.24823	4.06642	3.61133	3.53602	3.71566	5.7119
TCGA_TCGA-DU-A5TU	5.99534	3.36128	0.892833	2.2259	4.2773	5.09169	2.71394	3.62807	6.1415	4.00408	5.35889	5.36107	3.46569	4.38221	4.24741	3.08914	5.7768
TCGA_TCGA-06-0750	6.15087	2.37439	0.793072	1.83937	4.70004	4.79273	2.65742	4.25241	6.16238	3.90252	5.2994	5.27634	2.94343	3.70746	1.36427	2.79482	5.30874
TCGA_TCGA-DH-A7UR	5.37047	1.06908	1.37934	2.20437	5.17241	4.09878	2.81728	3.12222	5.75596	4.43923	5.62354	5.73415	2.8633	4.28441	1.22151	2.61465	5.82563
TCGA_TCGA-19-5960	7.00352	1.91073	1.49405	3.12194	5.70811	5.63656	2.91841	4.16077	6.59266	5.54808	5.83185	5.59636	4.42741	4.50395	6.56446	4.21161	5.7626
TCGA_TCGA-QH-A870	6.44781	2.12691	1.85083	2.31974	4.70435	5.23561	2.94496	3.41786	6.63842	5.03168	5.91431	5.85712	4.12533	4.25042	4.2944	3.99324	5.62075
TCGA_TCGA-R8-A6YH	5.61843	2.65353	2.09848	2.28841	4.50158	4.48777	2.49317	3.38163	5.8454	4.44083	5.74663	5.60785	4.11788	3.97924	0.926664	3.71643	5.97612
TCGA_TCGA-06-0125	6.48576	3.16265	1.32939	3.13973	5.64105	4.98151	2.45237	3.27325	6.86631	5.3405	5.78703	5.57328	4.22434	4.48524	1.201	3.56206	6.57333
TCGA_TCGA-E1-A7YV	6.07855	1.34526	1.71765	2.71116	5.23838	4.73333	2.81303	3.83001	6.39073	5.15924	7.14243	5.80739	3.84421	5.0006	5.7487	4.2405	5.80238
TCGA_TCGA-DH-5144	6.2586	1.63072	1.79814	2.66716	5.13257	4.70204	2.93644	3.42058	6.30083	5.2031	5.79937	6.20167	3.54864	3.79625	2.12032	3.27886	6.14507
TCGA_TCGA-TM-A7C3	6.5386	1.59615	1.54319	2.68564	4.65971	4.53886	3.55173	4.36305	6.4167	4.26661	5.96194	5.48909	3.80396	5.04039	5.67027	3.93951	5.99475
TCGA_TCGA-S9-A7IX	6.06712	3.97897	2.06818	2.29793	4.8042	4.60797	2.37196	3.1687	6.43874	4.88638	5.89328	5.76838	3.98313	5.46977	1.30441	3.47046	5.44574
TCGA_TCGA-HT-A61C	5.85608	2.68763	1.25744	2.46276	5.72165	4.76806	2.39036	3.63417	6.63995	4.58825	5.92487	5.60662	3.18793	4.51731	1.28992	2.89288	5.63884
TCGA_TCGA-DH-A7UT	5.80417	2.84711	1.38219	2.16724	4.10424	4.49729	2.36856	3.62137	5.6043	4.24118	5.36772	5.5039	3.78435	3.9957	3.07002	3.27449	5.84167
TCGA_TCGA-HT-7479	6.17621	3.78587	1.45978	2.51191	4.33973	4.47392	2.42321	3.1327	5.52654	4.66601	5.40291	5.37023	4.13537	3.23671	3.32694	3.59963	5.75941
TCGA_TCGA-QH-A6CZ	5.80266	2.55144	2.03849	2.10496	4.68928	4.45572	2.83621	3.49925	6.31316	5.00975	6.1087	6.03844	3.19757	5.17935	2.21892	3.30609	5.44636
TCGA_TCGA-S9-A7R2	5.93776	3.77597	1.13122	2.1937	4.4202	4.71029	2.51368	3.59648	5.85421	4.36899	5.44059	5.22522	4.42179	4.05424	3.5447	3.1921	5.28511
TCGA_TCGA-QH-A65X	4.97513	1.11677	1.44606	1.19862	4.65444	4.45699	2.58787	3.16242	5.47691	3.33877	6.09191	5.78935	2.25482	3.27387	3.86323	2.30307	5.90058
TCGA_TCGA-DU-8164	5.96167	2.10792	2.23477	2.8658	5.52012	4.55145	2.98236	2.89667	6.47949	5.44432	6.2311	6.05738	3.57281	4.97296	3.506	3.65491	6.4004
TCGA_TCGA-06-0745	5.80053	2.41603	1.42972	1.89306	5.21641	5.34533	2.70637	3.88656	5.92522	4.58386	5.51927	5.07915	2.77444	3.49254	1.38498	3.00764	6.31819
TCGA_TCGA-HT-7681	5.73647	2.54622	1.53725	1.706	5.00758	4.67738	2.72611	3.00871	6.30334	4.93676	6.05169	5.98985	3.08787	5.16669	2.67551	3.17994	6.21221
TCGA_TCGA-DU-A7TC	4.88812	2.01489	1.59013	1.44892	4.13736	4.2833	2.36256	2.91955	5.87165	4.24717	5.77597	5.59807	3.00376	4.86409	1.87902	3.34708	5.76138
TCGA_TCGA-HT-7481	5.8903	1.53586	1.98862	2.29567	4.97265	4.26901	2.58866	2.91265	6.02986	5.01161	5.55893	5.68282	3.8499	4.3883	1.12958	3.56441	5.7762
TCGA_TCGA-QH-A65R	5.68414	2.31057	1.90791	1.85079	4.50302	3.87049	2.91501	2.65332	5.86508	4.29261	6.0991	5.60101	2.71956	4.0799	1.35807	2.84493	5.9233
TCGA_TCGA-HT-7857	6.59023	4.85591	1.01475	3.65632	5.24964	4.77361	2.28819	3.20852	5.89514	5.03375	4.83736	5.54719	3.90756	4.7768	2.32711	3.13239	6.06665
TCGA_TCGA-27-2528	6.62104	1.2944	1.47887	2.36295	5.69873	5.24092	2.55418	3.30084	6.16626	5.57722	5.79841	5.88569	3.79279	3.95966	0.973343	3.76316	6.6063
TCGA_TCGA-S9-A7R4	5.69936	4.35274	2.16151	2.62664	4.60153	4.32743	2.39476	3.18003	5.65157	4.51784	5.51947	5.42722	3.64317	4.48219	3.50799	3.54346	5.7362
TCGA_TCGA-DU-7299	6.20323	3.42807	1.59859	2.95025	5.03373	4.70727	2.79677	3.18323	6.26009	5.12816	5.82168	5.86807	4.21983	4.13025	2.97969	3.99719	6.29995
TCGA_TCGA-06-2558	6.14759	2.6558	1.4857	3.00585	5.95097	4.88239	2.7604	3.84962	6.54594	5.23861	5.7114	5.8014	3.61574	4.86504	6.30549	3.83528	6.46468
TCGA_TCGA-DU-7306	6.38185	2.02132	1.22612	2.49094	4.84496	4.72914	2.11641	2.83536	6.82185	5.23704	5.82311	5.37812	4.151	3.72095	3.65881	4.38175	6.103
TCGA_TCGA-06-2561	6.19143	3.31363	1.11457	2.76045	5.29391	5.41355	2.76276	3.54113	6.28226	5.00875	5.53862	5.65496	3.73468	4.54542	1.43724	3.50343	5.48023
TCGA_TCGA-FG-6692	5.73873	1.74829	0.763397	1.61501	4.82539	4.72293	2.31835	3.33336	6.20366	4.31681	5.51133	5.10486	3.30811	4.07942	3.86748	2.75754	6.05646
TCGA_TCGA-QH-A6CS	6.33111	2.78382	1.1552	1.88081	4.64141	4.8138	2.69773	2.75025	7.25397	4.82283	6.32883	5.93167	3.63608	3.03589	2.53379	3.76463	5.72502
TCGA_TCGA-RY-A845	5.72741	3.3633	1.88892	2.33016	4.59232	4.97707	2.86233	3.38085	6.51374	4.72118	5.75194	5.67671	4.10784	4.39087	3.8428	3.98843	5.98311
TCGA_TCGA-DU-A5TT	5.61587	3.41554	1.5001	2.76008	4.85895	5.28195	2.60177	3.392	6.78121	4.16573	5.76684	4.59762	4.13118	3.96459	5.0816	3.19693	5.4836
TCGA_TCGA-27-1830	6.5578	2.92402	1.24905	3.0001	5.38828	4.61515	2.61983	3.6004	6.47403	4.62564	5.52355	5.36827	4.12918	4.08544	1.11354	3.51092	6.15086
TCGA_TCGA-41-5651	6.18777	1.59399	2.22348	2.87854	5.16694	4.98459	2.91153	3.61226	6.25785	5.03829	6.12843	5.61884	3.84118	4.59602	6.82044	3.22961	6.59672
TCGA_TCGA-TM-A84S	6.19298	2.26976	1.18508	2.17217	4.98607	4.43617	2.91795	3.31605	5.58674	4.5275	5.57176	5.32399	3.4459	3.49607	3.33019	2.97426	5.72298
TCGA_TCGA-06-0211	6.51702	2.89599	1.48239	2.56689	5.95112	4.86924	2.62398	3.38918	6.38155	5.42558	5.4704	5.92065	3.57751	4.29612	1.13515	3.44666	6.68421
TCGA_TCGA-TQ-A7RP	5.83781	3.47425	1.76373	1.87843	4.11561	4.80846	2.54094	2.81439	6.66887	4.66677	5.67463	5.56	4.04424	3.70899	2.91629	3.4991	5.76644
TCGA_TCGA-S9-A7IQ	4.73232	2.14468	1.81865	1.53027	4.19067	4.32768	2.54593	2.37128	6.33884	5.11564	6.1114	5.72129	3.30401	6.39549	1.64547	3.38369	5.84952
TCGA_TCGA-16-0846	6.55608	3.10436	1.2594	2.3402	5.10475	4.93312	2.60338	3.61256	6.06483	3.86088	5.45181	5.33537	3.77509	4.16986	6.20534	3.30921	5.99477
TCGA_TCGA-HW-7489	5.6967	2.51454	1.56681	1.89594	4.36747	4.4627	2.47698	2.87122	5.89214	4.93965	5.98172	5.56998	3.70645	5.66207	3.07893	3.83115	5.86475
TCGA_TCGA-S9-A6WN	6.77653	3.97117	2.17962	3.08125	4.89366	5.38719	2.06758	3.20354	6.32183	5.41728	5.48141	5.83128	3.84858	4.87578	3.69227	3.05264	6.14662
TCGA_TCGA-TQ-A7RO	5.73056	2.44486	2.67091	2.3994	5.69868	4.72499	2.72068	3.12985	6.61359	5.36887	6.41843	6.03213	3.66943	4.34527	4.16934	3.40607	6.42011
TCGA_TCGA-HT-7695	5.8891	2.26546	1.87095	2.31255	5.29498	4.33727	2.60215	2.92839	6.44876	5.46329	5.88015	5.95731	3.63333	5.68771	1.79897	3.79314	6.13192
TCGA_TCGA-DU-6410	6.49336	0.76545	2.54695	3.3756	5.06689	3.88018	2.6764	2.95866	6.66208	5.27352	5.96741	5.46064	3.5379	5.07355	2.40973	3.57266	6.2698
TCGA_TCGA-28-5204	6.49549	2.9886	1.57821	2.33216	6.12447	5.65886	2.25388	3.38205	7.4263	5.63481	6.2508	6.13119	3.83635	3.99435	0.883128	3.82784	7.26324
TCGA_TCGA-HT-8107	5.09084	2.45003	1.68938	1.87493	4.66672	4.13797	2.31663	2.08921	5.94542	5.29129	5.88435	5.36324	3.69377	6.65595	0.798776	3.87464	5.77165
TCGA_TCGA-HT-A5RC	6.89259	3.03427	1.38115	3.1511	5.60178	4.83594	2.90806	3.07186	6.80648	5.6676	5.65102	5.7222	4.32105	4.40936	1.32154	4.1934	6.51949
TCGA_TCGA-32-2616	6.76914	1.88297	0.503343	2.87583	5.92748	5.35929	2.0562	3.60246	6.53682	5.40405	5.55185	5.4157	3.96573	3.19486	8.02669	3.3352	5.54364
TCGA_TCGA-DU-A5TP	6.79461	3.71178	1.10502	2.6307	6.01825	5.65159	2.65663	3.08701	5.83915	5.13253	5.72133	5.61274	4.22671	4.93961	4.56318	3.28962	6.21234
TCGA_TCGA-DU-8158	6.61947	3.24622	1.32615	3.45184	5.63848	5.0663	2.81054	3.66193	6.35497	5.24462	5.83447	5.74407	4.75924	4.38699	0.948474	4.08075	5.58416
TCGA_TCGA-P5-A72X	5.46975	2.10227	1.76054	1.84216	4.55828	4.35206	2.06963	2.99233	5.37867	4.77159	5.70209	5.27026	3.83295	3.83009	3.577	3.81456	5.70721
TCGA_TCGA-E1-A7YE	6.12613	4.01548	1.57687	3.12443	5.8226	5.19478	3.07913	3.42075	6.11152	5.09939	5.56381	5.65631	4.62135	4.65757	4.46155	3.88131	6.14762
TCGA_TCGA-DB-A4XD	6.12163	2.58385	2.30995	2.49825	4.75332	4.73179	2.78365	3.15232	6.32937	4.73293	5.80055	5.61946	4.44919	4.04084	3.48796	4.24025	6.03271
TCGA_TCGA-CS-5393	5.83958	3.6661	1.68591	2.52842	4.59853	4.26413	2.30132	3.08388	5.3081	4.57211	5.46928	5.16503	3.93511	4.03488	2.58178	3.97126	5.87525
TCGA_TCGA-27-2523	6.3822	2.00854	1.36106	2.63581	5.84019	5.3431	2.3023	3.64231	6.58419	5.75519	5.51019	5.91481	3.53741	4.21431	1.08187	3.54189	6.99266
TCGA_TCGA-HT-A618	6.09751	3.96578	1.21298	2.87752	4.89885	5.32615	2.64683	3.42299	6.16482	4.90757	5.09956	5.70389	3.70758	4.86379	4.13005	3.76655	5.71342
TCGA_TCGA-28-5207	6.1973	3.63161	1.96888	2.50094	5.92346	4.73422	2.83348	4.29595	7.02074	4.69629	6.17938	5.85181	3.70493	4.73755	5.97221	3.93751	6.2321
TCGA_TCGA-14-0787	6.21106	2.59553	1.2312	2.16529	5.48811	5.3947	2.91514	3.80992	6.4863	4.8523	5.53715	5.91391	3.28611	3.93575	1.22712	3.06083	6.48364
TCGA_TCGA-TM-A84C	6.3403	2.5455	1.69645	2.71652	5.33917	5.31938	1.90703	2.62968	6.40796	5.345	5.86504	5.95591	4.36692	4.08004	2.00539	3.34472	6.21262
TCGA_TCGA-P5-A72W	5.80931	1.98057	0.652189	1.35761	3.90133	5.15553	2.15868	3.71102	5.41994	3.96802	6.01482	5.5341	3.25161	3.38343	4.38034	3.404	5.51539
TCGA_TCGA-S9-A7R8	5.90568	3.30676	1.76967	2.9694	4.23302	4.16236	3.03539	3.24681	5.46537	4.25292	5.91872	5.26661	3.78286	4.73129	3.86388	3.84364	5.29107
TCGA_TCGA-12-3653	6.63281	2.65629	1.32016	2.60921	5.15665	4.81677	2.68824	4.10759	6.62083	5.09114	6.25962	5.33352	3.86837	4.14743	2.10566	3.99796	6.22238
TCGA_TCGA-S9-A89V	6.45359	3.68694	2.09765	3.71316	4.92678	4.48805	3.03053	3.95892	6.1365	5.14245	5.62598	5.35586	4.87908	5.10057	3.43592	4.32916	6.31352
TCGA_TCGA-02-2483	6.03475	2.16558	0.958785	2.35234	6.00038	5.38849	2.1658	3.71722	5.91254	5.13068	5.43725	5.70388	3.15742	4.0218	3.96673	2.97347	6.33148
TCGA_TCGA-HT-7691	6.61368	4.87105	1.7058	1.98464	4.71902	5.23732	2.26459	3.35829	6.05067	4.77813	5.25903	5.86177	3.97914	3.88414	4.83417	3.50286	6.01007
TCGA_TCGA-06-0171	6.63047	4.84355	1.28694	3.65786	6.02809	4.55782	2.19502	3.13846	5.75099	4.86803	4.90563	5.24306	4.66641	4.15837	1.60236	3.56688	6.02336
TCGA_TCGA-DU-7292	5.62052	1.74426	1.87201	1.95993	5.01262	4.29681	2.04537	2.56253	6.50892	5.20911	5.78267	5.5119	3.83344	6.07406	0.613785	3.60247	6.06062
TCGA_TCGA-P5-A730	6.18534	0.92188	1.44586	2.41801	4.32343	4.10721	2.81565	3.90167	5.85027	4.6625	6.1726	5.57298	3.17541	4.4466	1.48715	3.30973	6.00239
TCGA_TCGA-06-0184	6.35324	3.13749	0.714159	2.24088	5.25839	4.54994	2.50569	3.84511	6.55022	4.43481	5.37285	5.53541	2.98389	3.61168	8.17113	3.20513	6.58711
TCGA_TCGA-06-0178	5.47921	2.02554	0.926027	1.86031	5.40748	4.75474	2.7645	3.83231	4.74854	3.94681	4.55001	5.73342	2.04945	3.69389	5.84939	3.23929	6.04655
TCGA_TCGA-S9-A6WI	4.88712	2.84251	1.33219	1.50495	3.90009	4.06607	2.43084	2.54825	5.85776	4.68856	5.86237	5.68986	3.25546	6.15963	1.41386	3.14377	5.57021
TCGA_TCGA-41-3915	6.5773	2.70884	0.938359	3.08796	5.65153	5.04347	2.76544	3.79771	5.5306	4.61343	5.33196	5.63835	4.01305	3.90527	7.19156	3.33531	6.31472
TCGA_TCGA-FG-5965	5.92242	3.07744	1.53917	2.38445	4.8318	5.15494	2.48785	3.26599	6.25775	5.03829	5.7791	5.81337	3.89369	5.40711	0.792628	3.82656	5.91577
TCGA_TCGA-19-4065	6.04622	2.56088	1.26173	3.01754	5.93702	5.3838	2.36152	3.45092	6.14018	4.97461	5.94322	5.61452	3.4653	5.25147	1.76434	3.18825	6.07603
TCGA_TCGA-HT-8564	6.26414	3.4826	2.42445	2.88987	5.24304	4.58228	3.01339	3.01701	6.40244	4.69744	5.99237	5.54747	4.45522	6.06078	3.97227	4.1048	5.73713
TCGA_TCGA-DU-A5TW	5.878	3.26495	1.75892	2.41663	4.3756	4.65883	3.09636	3.73134	6.58735	4.65361	5.81403	5.21703	4.14167	4.4766	3.97848	3.72827	6.03586
TCGA_TCGA-06-1804	6.32473	2.69682	1.11978	2.85547	5.62183	4.66397	3.19503	4.01683	6.49468	5.29867	5.44296	5.35531	4.91974	4.00697	5.25105	3.93619	5.33838
TCGA_TCGA-S9-A7QZ	5.37094	1.74517	2.22024	2.13952	4.5057	3.84226	3.17062	3.08412	5.81447	4.47928	5.77654	5.58827	3.22362	4.19657	3.66318	3.11389	5.57545
TCGA_TCGA-HT-7480	6.09057	2.18554	2.05222	2.67344	5.11658	4.28159	3.04833	3.5144	5.69612	5.00171	5.66971	5.59731	3.74773	5.01242	2.07071	3.22484	6.0435
TCGA_TCGA-DB-A4XG	5.85644	1.48906	2.36177	2.51068	5.16204	4.73929	2.89677	3.54402	6.38483	5.25282	6.25682	5.99027	3.48871	4.9643	3.1848	3.55921	6.30478
TCGA_TCGA-CS-6668	6.10169	1.36743	2.44712	3.15347	5.71292	4.64109	3.20768	3.39857	6.45479	5.25168	5.7254	6.6763	3.79006	3.92139	2.73786	3.61583	5.4573
TCGA_TCGA-VW-A8FI	5.23977	1.94791	0.851033	1.78781	3.855	4.41361	2.13605	3.22407	4.84245	3.58085	5.72385	4.80464	3.09898	3.63209	6.88252	3.06013	5.16132
TCGA_TCGA-HT-A5R7	5.46158	3.69746	1.88279	1.81676	4.78695	4.43171	2.64707	2.73636	5.99868	4.75831	5.74587	5.59247	3.83564	5.93102	3.70105	3.58268	5.85139
TCGA_TCGA-TM-A7C4	5.18307	1.99316	2.25664	1.7907	4.47724	4.35605	2.2531	2.55066	6.26286	4.54372	5.796	5.64776	3.55514	5.57638	1.06158	3.72189	5.51002
TCGA_TCGA-12-0619	6.65562	3.02542	1.09305	3.13799	5.63606	4.64075	2.07411	3.48363	6.01167	4.8903	6.0529	5.07691	4.40696	4.05865	7.08273	3.50223	6.47882
TCGA_TCGA-DH-A669	6.23737	1.83503	1.56414	2.50971	5.34762	4.69946	2.82942	3.19341	6.837	4.70752	6.87158	5.78244	3.06268	4.11196	6.99354	3.28228	6.54818
TCGA_TCGA-P5-A5F4	5.55574	2.13403	1.71815	1.95952	4.07311	4.52411	2.67556	3.21138	5.93685	4.42493	5.87405	5.7023	3.35188	5.50267	2.12144	3.46457	5.85478
TCGA_TCGA-DU-A6S7	5.27272	3.43768	1.96164	2.24243	4.55836	4.48237	2.70684	2.93964	5.87111	4.67197	5.84998	5.67837	4.04393	3.54944	1.95169	3.79009	6.07511
TCGA_TCGA-02-2485	6.54015	2.3497	1.14728	2.62687	5.72579	4.90573	2.3009	3.98968	6.48551	5.32411	5.83158	5.62584	3.89847	4.2503	6.97245	3.75742	6.56178
TCGA_TCGA-S9-A7QY	5.19888	1.65189	1.30166	2.11877	4.28878	4.1383	2.63931	3.07055	6.01273	4.32361	5.66315	5.413	3.03005	3.97902	3.14095	2.76216	5.56895
TCGA_TCGA-02-0047	6.03066	3.39652	1.24472	3.01308	5.55073	5.01949	2.25447	2.76161	5.93737	5.06637	5.449	5.66972	4.18871	4.31443	1.51619	3.57487	6.07775
TCGA_TCGA-14-0781	6.38656	2.73137	0.994982	2.6533	4.98643	5.17107	1.97927	3.10197	6.2575	4.80431	5.18987	5.74379	3.29648	4.45987	0.965669	2.87782	6.1109
TCGA_TCGA-FG-A87N	6.50644	2.56257	2.23168	3.4414	6.0127	5.28401	2.62054	2.92928	6.40174	5.53659	5.98461	6.10586	4.44095	4.99002	0.792933	3.8222	6.64879
TCGA_TCGA-FG-8191	6.44488	4.46733	1.76395	2.67639	4.50443	5.18829	2.64662	3.63996	6.09953	4.5529	5.68432	5.47561	4.44086	4.53274	3.77296	4.05485	5.78728
TCGA_TCGA-E1-A7YI	6.66775	1.77306	1.00437	3.1373	5.82341	5.08784	2.40263	3.38471	6.03473	5.65353	6.44575	5.92268	4.38988	5.31855	1.07251	3.59683	6.75791
TCGA_TCGA-HT-7856	5.33079	2.0726	1.91531	2.00712	4.60638	3.94495	2.44097	2.6734	5.77135	4.8964	5.70901	5.44594	3.68745	5.5627	1.89098	3.54367	5.69636
TCGA_TCGA-27-2521	5.61667	1.47061	1.53109	2.09232	4.76993	5.59735	3.04262	3.65951	6.27808	5.71869	6.40609	6.28409	3.18404	3.41362	2.03435	3.30905	6.82759
TCGA_TCGA-S9-A6TZ	6.65718	3.02564	2.11708	3.04766	4.90109	4.98443	3.34298	3.6082	6.23761	4.89979	6.00502	5.89851	4.4122	4.64356	3.32476	4.67888	6.47934
TCGA_TCGA-DU-A7TA	5.89715	4.4479	1.09632	2.52914	4.24327	4.65858	3.09868	3.94276	6.57019	4.52446	6.28042	4.11425	3.95783	4.40926	2.67059	3.5966	6.3107
TCGA_TCGA-06-0132	5.88151	3.12792	1.31159	2.19811	4.92509	4.78952	2.16367	2.81871	5.76278	4.5749	5.14926	5.35121	3.06801	4.96054	1.86348	3.18014	5.88015
TCGA_TCGA-32-1970	6.47943	2.4753	1.23923	2.18189	5.44246	4.50645	3.02934	3.70775	6.55396	5.04089	5.92332	5.38788	4.10789	4.23858	5.3882	3.7433	6.52885
TCGA_TCGA-06-0882	6.31976	2.92151	1.29645	2.55131	5.15606	5.22389	2.51212	3.61831	6.45644	5.01529	5.34803	5.67342	3.6364	4.55434	1.6694	3.33506	6.19578
TCGA_TCGA-DU-5871	6.24776	3.23172	1.56909	2.46335	4.71956	4.818	2.5638	3.25084	5.64342	5.70358	5.81262	5.36645	4.36591	3.94478	4.71578	4.34182	6.17276
TCGA_TCGA-14-1402	5.9561	1.63175	0.826592	2.56121	5.96514	5.42041	3.28477	4.1239	5.57413	5.09938	4.68553	5.39527	2.32102	4.46091	1.54476	3.3723	6.5617
TCGA_TCGA-E1-5303	6.30726	3.83968	1.2726	2.38484	4.63281	4.56434	2.4507	2.78082	5.39302	4.73312	5.83775	5.52675	4.0062	3.19181	3.30298	3.59875	5.89608
TCGA_TCGA-32-1982	6.202	2.88128	0.998385	2.35286	5.30896	4.67766	2.82896	4.06303	5.97811	4.67965	5.31299	5.64708	3.05868	4.20265	2.55651	2.91624	6.49391
TCGA_TCGA-DU-A76L	6.7651	2.59093	1.51507	3.47492	5.99929	4.7663	2.49817	3.76444	6.74076	5.41105	5.60518	5.9804	4.33453	5.14621	1.41339	3.7279	5.94754
TCGA_TCGA-DH-A66B	6.27997	3.64048	1.28524	2.444	4.93669	5.25332	3.02434	3.22876	6.14804	4.99571	5.0923	5.76301	4.19761	4.72567	4.07733	3.94417	6.40824
TCGA_TCGA-P5-A735	5.7265	2.77017	1.47965	1.85928	4.3401	4.45798	2.3433	3.25873	5.7019	4.09984	5.937	5.71585	3.748	3.95211	3.04622	3.52125	5.9044
TCGA_TCGA-DU-6399	6.18351	3.38881	1.69493	2.86449	5.09101	4.48602	2.40074	2.93209	6.24581	4.98765	5.99375	5.66682	4.45252	3.31449	3.705	3.91591	6.27167
TCGA_TCGA-E1-A7YH	6.03108	2.9837	2.04645	2.42005	4.34797	4.66048	2.88019	3.63425	5.81881	4.35572	6.06051	5.57075	4.19943	3.79064	4.4158	3.77615	6.06543
TCGA_TCGA-FG-8188	6.21717	3.13189	1.85765	2.6123	4.86189	4.67307	2.50723	2.99495	5.98385	4.71334	5.67998	5.42503	4.39972	3.95504	2.45923	4.01296	6.00111
TCGA_TCGA-HW-7490	6.06221	2.97062	1.25827	2.14442	4.69588	4.90145	2.47844	3.48312	6.11061	5.57169	6.01965	5.57035	3.80041	3.82307	2.61919	3.85476	6.1859
TCGA_TCGA-HT-7478	6.37855	4.64425	1.54719	2.82956	5.58671	4.93494	2.56808	3.08809	6.37204	4.99829	5.53384	5.43219	4.18236	4.32763	2.79702	3.59481	6.2375
TCGA_TCGA-27-2524	6.00791	2.15417	0.657796	2.17633	5.40356	5.22232	2.15228	3.35664	6.16078	4.3996	5.42812	5.6622	2.76902	4.05028	2.00975	2.74698	6.58571
TCGA_TCGA-32-1980	6.03284	3.51102	1.47437	2.12938	5.30951	4.64058	2.49428	3.51832	5.88859	4.84053	5.57953	5.7334	3.34693	5.40192	1.92729	3.27062	6.0864
TCGA_TCGA-S9-A6U5	5.99262	1.57084	1.79523	2.10629	4.81335	4.48152	2.74199	3.18694	5.63298	4.47669	5.71146	5.76705	2.9553	3.61277	3.88504	2.8646	5.73502
TCGA_TCGA-HT-7855	6.39417	2.60548	1.95102	2.71237	4.81742	4.43683	2.95099	3.24936	5.67498	5.09282	5.59052	5.46314	4.19422	3.95369	3.37277	4.61188	6.40835
TCGA_TCGA-06-0646	6.45277	3.67637	1.28376	2.73805	6.10022	4.80376	2.41519	3.25956	6.41732	5.05013	5.58055	5.47588	3.89198	4.17309	1.36004	3.40828	5.63922
TCGA_TCGA-S9-A6WH	6.17674	1.51997	1.94312	2.5434	5.08392	4.30928	3.56816	3.694	5.98583	4.724	5.68494	5.89634	3.53588	4.15074	3.79805	3.27288	6.00566
TCGA_TCGA-S9-A6WL	5.7081	1.62711	2.29627	2.6511	5.16905	3.93106	2.19353	2.81793	6.32411	5.2961	6.20808	5.73186	3.35129	5.64255	2.23313	3.41377	5.9837
TCGA_TCGA-27-1831	5.93752	1.50764	0.436592	2.36871	5.58114	5.64594	3.12079	4.6354	6.60581	4.39471	3.97584	5.85426	2.00095	4.9367	1.77044	3.48806	6.61108
TCGA_TCGA-S9-A6WP	5.79673	1.86169	1.73245	2.42366	4.8201	4.21858	2.9389	3.27875	5.7395	4.4509	5.71323	5.70162	3.07263	3.91887	2.66284	2.98319	5.32236
TCGA_TCGA-P5-A5EV	6.04433	2.82761	1.7395	2.25286	4.81424	4.79825	2.51786	3.00686	7.12746	5.02051	6.2756	5.99346	3.72865	3.95283	3.52827	4.08355	5.79731
TCGA_TCGA-DU-A76O	5.24318	3.45999	1.57228	2.00636	5.00512	4.39129	2.2606	2.90254	5.48667	4.04745	5.96697	5.59797	3.34394	3.56174	3.31064	3.34115	5.906
TCGA_TCGA-DU-5872	5.98102	3.56251	1.18749	2.45249	4.66241	4.66178	2.58841	3.21014	6.17889	4.46793	5.6055	5.43764	3.73722	4.0932	3.66888	3.45728	5.43993
TCGA_TCGA-32-2632	6.06171	3.03767	1.52724	2.29436	5.39409	4.62706	1.87934	3.03106	6.4582	4.55537	5.64012	5.43161	3.45047	3.70894	6.94385	3.09613	6.80474
TCGA_TCGA-HT-A617	6.11505	2.46182	0.891298	1.97953	4.88006	5.91737	2.7176	3.61864	7.2738	4.8619	5.78044	5.66867	3.55237	4.37477	3.81887	3.4231	5.28292
TCGA_TCGA-DB-5276	6.60642	3.91056	1.18365	3.01945	4.756	4.6635	2.64511	3.44334	6.12746	5.34503	5.8601	5.83095	4.63249	5.23712	4.02002	4.09829	6.22219
TCGA_TCGA-06-0210	6.37135	3.43464	1.3997	2.81248	5.13027	5.17051	2.35782	3.30074	6.37168	5.00847	5.45194	5.5836	3.81563	3.85069	1.57501	3.10868	6.37634
TCGA_TCGA-HT-7879	5.90188	3.2038	2.17179	2.44745	4.66905	4.56363	2.81165	3.22868	5.82142	4.75563	5.67518	5.67454	4.35156	4.0808	2.85657	3.82399	6.17856
TCGA_TCGA-TM-A84G	6.42131	1.01899	2.33389	2.99974	5.23654	4.5082	3.24492	3.14609	6.34684	4.95312	5.99316	6.54075	3.76542	3.77524	3.42644	3.20211	6.32884
TCGA_TCGA-QH-A65V	6.15003	2.23454	1.45893	1.69089	4.59882	4.75545	2.72223	3.29853	5.88391	4.34593	5.68231	5.7543	3.44783	3.7017	3.46445	2.95294	5.79055
TCGA_TCGA-DU-8166	6.39949	3.00608	2.38477	3.05459	5.43864	4.81698	2.44073	3.07035	6.60319	5.15924	5.85787	5.56477	4.6284	5.02592	3.14732	4.31525	6.15677
TCGA_TCGA-HT-7860	6.68507	3.96993	2.29315	2.97211	5.99015	4.78528	2.92056	3.25454	7.09732	5.60204	5.76236	6.01768	3.73263	4.3628	0.831109	4.26308	6.51961
TCGA_TCGA-06-0139	5.81616	3.30935	0.670947	2.50249	6.51375	4.9057	2.38997	3.67895	5.5557	4.21257	4.30579	5.43986	2.85306	3.99217	3.05147	2.81598	5.96897
TCGA_TCGA-06-5411	5.72341	2.5084	1.54263	2.23758	5.6931	4.99531	2.81402	3.49075	6.2872	5.07319	5.78616	6.07687	3.16406	5.09513	1.41144	3.29039	5.96476
TCGA_TCGA-S9-A6U2	5.99667	4.29037	2.37638	2.56354	5.4797	4.54197	2.97329	3.13702	6.11657	5.01424	5.88425	5.89328	3.68684	3.7695	3.27441	3.38344	6.08515
TCGA_TCGA-12-3652	5.61231	1.03303	0.583473	1.91102	4.78125	5.26059	2.52302	3.82008	5.29378	4.90178	5.97473	5.98279	2.21182	4.44644	1.0565	3.20049	6.75117
TCGA_TCGA-E1-A7Z4	6.33264	2.96438	1.4147	1.89465	3.79635	4.97784	2.73527	3.83806	5.59682	4.47024	5.55209	5.86048	4.04038	3.97039	5.07291	3.80714	5.6504
TCGA_TCGA-DH-A66F	6.37345	1.33772	1.51736	2.12885	4.83506	4.64351	3.40652	3.80517	6.13273	4.96355	5.82971	5.67482	3.19294	3.70453	2.85977	3.2229	5.91889
TCGA_TCGA-QH-A6CY	5.81425	1.71134	1.36851	1.8947	4.51288	4.30104	2.63056	3.10498	5.9334	4.66459	5.75242	5.72612	3.41415	5.42993	1.90459	3.25899	5.76001
TCGA_TCGA-CS-5396	7.23079	1.3195	2.21744	3.49211	5.66256	4.78155	2.33861	3.54708	6.20541	6.06704	6.32611	6.06971	3.91258	4.19361	5.61439	3.9134	6.31812
TCGA_TCGA-E1-A7YM	6.10708	2.17992	1.11275	1.96671	4.66988	4.51599	2.68749	3.45047	5.73215	4.31878	5.7466	5.40788	4.02184	3.73927	3.91573	3.69612	5.11497
TCGA_TCGA-28-2514	6.56946	2.01067	1.64866	2.6904	5.88416	5.12507	1.90105	3.23226	6.24697	5.50162	6.09689	6.10783	3.83042	5.13005	1.27241	3.78505	6.56407
TCGA_TCGA-DU-5852	6.37425	3.03035	1.34214	2.74363	5.92507	4.7528	2.32909	3.3529	6.01673	5.71802	5.97522	5.66338	4.02504	4.70166	1.08367	4.05286	5.98559
TCGA_TCGA-FG-A4MY	5.82935	1.6965	1.21964	2.24205	4.63694	4.41216	2.52888	3.4444	5.33337	4.30342	5.55144	5.12415	3.92816	4.13376	3.86406	3.35195	5.25339
TCGA_TCGA-32-4213	5.9386	2.52985	0.76538	2.41435	4.73247	5.29725	1.74883	3.05085	5.64826	4.98919	5.3172	5.64235	3.00513	3.61013	2.10653	2.91345	6.3284
TCGA_TCGA-19-2619	6.79278	2.73895	1.71291	2.15272	5.82597	5.17205	2.27787	2.6933	6.52234	5.35935	5.74473	5.85054	3.575	3.5045	1.19936	3.24912	6.7791
TCGA_TCGA-12-1597	5.5376	2.71175	1.39119	2.31949	5.10363	4.79638	2.57746	3.53522	5.54788	4.32857	5.93982	5.47171	2.86173	3.53592	6.34066	3.32368	6.68771
TCGA_TCGA-HT-7611	6.54672	3.55482	1.341	2.91731	5.40075	4.92798	2.77933	3.49998	6.17035	5.46344	6.02003	6.03946	4.83823	3.45649	4.3567	4.37146	6.33734
TCGA_TCGA-S9-A6WD	5.66086	2.06448	1.51774	2.50167	4.95599	4.98011	2.69086	3.24708	6.05234	5.19233	6.12844	5.76903	3.13387	3.88451	3.96204	3.00611	5.16929
TCGA_TCGA-VV-A86M	5.73127	3.3469	1.15335	3.06281	4.45161	4.60095	2.66045	3.46553	5.94529	4.45734	5.23403	5.72403	3.83389	4.54999	1.8558	3.72922	5.21877
TCGA_TCGA-HT-7468	6.58392	2.18072	2.59017	2.89053	5.58791	4.87156	3.14217	3.55566	6.31218	5.19738	5.86415	5.87883	3.74264	4.02052	1.46167	3.38431	6.34929
TCGA_TCGA-DB-A4XF	5.84966	2.19375	1.80099	2.42426	4.48133	4.37923	2.47032	3.15077	6.15991	4.95786	5.64548	5.30693	3.90662	4.86853	4.14779	3.77747	6.11993
TCGA_TCGA-HT-8108	5.89522	3.84137	2.11948	2.75952	5.10989	4.47604	2.71197	3.26178	6.75271	4.78176	5.73144	5.68673	4.16536	4.21129	2.16954	4.02535	6.09051
TCGA_TCGA-FG-7637	6.27457	1.64308	2.23746	2.61121	5.22544	4.2919	3.05914	3.22114	6.77638	5.14101	5.79211	5.47794	3.43914	3.38908	2.32605	3.52381	6.26761
TCGA_TCGA-14-0790	6.379	1.59606	0.979575	2.17046	5.53515	5.34919	2.97827	3.61119	6.547	5.20727	5.80087	5.87434	3.43107	4.37797	0.963967	3.80148	6.48246
TCGA_TCGA-P5-A780	5.94092	2.74335	1.50184	1.54883	4.17372	4.15988	2.64288	2.84809	5.3511	4.20331	5.67785	5.02585	3.72706	4.37264	2.42265	3.49641	5.91917
TCGA_TCGA-14-1034	6.66883	2.62516	0.792458	3.34253	6.2341	5.25294	2.90862	3.95471	6.66251	5.68515	5.86226	5.68984	4.66713	4.00394	7.04889	4.39994	6.74169
TCGA_TCGA-DU-6401	6.04688	1.80405	1.82209	2.25038	4.98768	4.11328	2.59148	3.15862	5.38651	4.82578	5.0405	5.27747	3.79323	3.39168	3.38487	4.44703	6.05334
TCGA_TCGA-HT-7605	5.98285	2.14793	1.58643	2.08522	5.09284	4.27814	2.68244	3.13861	6.09803	5.01281	5.74134	5.53059	3.54763	5.36153	1.93459	3.61722	5.7878
TCGA_TCGA-CS-6188	7.08715	2.91284	1.74437	3.15276	5.62943	5.09597	2.70007	3.23197	6.84204	5.53261	5.67747	5.68202	4.32055	4.37741	1.16176	4.21	6.40879
TCGA_TCGA-DU-A7TI	6.28821	6.86924	1.71174	2.58666	4.89095	5.0492	2.58644	3.09455	6.02719	4.8602	5.8977	5.41961	4.12841	5.29549	3.66332	3.71782	5.9705
TCGA_TCGA-DB-A4XC	5.91993	3.46677	2.07273	2.55192	4.5519	4.74857	2.86972	3.38325	5.88312	4.7238	5.75703	5.28818	4.21646	4.82116	2.6323	4.11528	6.02735
TCGA_TCGA-FG-A4MX	4.55602	2.20317	0.917183	1.79075	2.429	3.48702	2.03005	3.23437	3.8473	2.49266	5.73831	4.33965	2.16387	3.58703	3.51734	3.01379	4.82593
TCGA_TCGA-HT-8105	6.32312	1.6129	1.89701	3.00612	5.4793	4.40029	3.42911	3.43619	6.54931	5.33823	5.92896	5.5942	3.6453	5.40682	0.448105	3.9265	6.2993
TCGA_TCGA-06-0129	5.63116	3.66798	2.1971	3.63327	5.77323	4.99302	3.16889	3.8492	5.91938	5.23118	6.24282	5.52437	4.35758	4.46074	6.56421	3.98799	6.419
TCGA_TCGA-CS-4942	6.21624	4.38385	1.46571	2.58164	5.42448	4.92483	2.53699	2.78095	6.46545	5.00347	5.54966	5.81871	4.31803	3.54616	1.4739	3.85283	5.52852
TCGA_TCGA-76-4931	6.18384	2.06427	1.66818	2.35304	5.76344	5.17184	3.0417	3.64616	6.78012	5.22946	6.16001	5.77332	3.85104	4.39164	1.36035	3.54492	7.0226
TCGA_TCGA-TM-A84R	5.12087	1.83387	1.55935	1.91699	4.20162	4.35115	2.64717	3.06225	6.22567	5.23201	6.25833	5.7636	3.52668	6.49139	1.79798	3.73547	5.95089
TCGA_TCGA-HT-7676	5.89373	3.61234	1.28027	2.2692	4.71274	4.96592	2.37207	3.21314	5.66201	4.52614	5.55879	5.65813	3.77019	3.48613	3.36205	3.6334	5.88161
TCGA_TCGA-FG-A60L	5.24705	3.51113	1.09598	1.35678	3.75417	5.22149	2.5618	3.40445	5.84946	3.1803	5.64794	5.49698	3.21332	3.74039	3.91501	2.64276	5.87059
TCGA_TCGA-HT-7875	5.91531	1.96075	2.17253	2.24963	5.50187	4.52565	2.938	3.2295	5.96641	4.96395	5.90331	5.77038	3.3246	4.4257	2.90405	3.23059	6.15382
TCGA_TCGA-DU-A7TG	5.11513	2.98207	1.70096	1.72387	4.20327	4.26024	2.32429	2.74734	5.97907	5.00658	5.75931	5.34941	3.47066	6.20495	1.08568	3.46343	5.59756
TCGA_TCGA-HT-7880	5.06044	2.2045	1.6557	1.6692	4.24947	3.92976	2.26447	2.50502	5.70954	4.45915	5.41218	5.30348	3.49431	5.47726	1.0274	3.38131	5.48438
TCGA_TCGA-TM-A84B	6.81226	1.91312	1.7128	2.32731	6.20691	5.24527	3.35478	3.12968	7.24171	5.84594	6.10826	6.02489	4.15403	4.31553	5.95775	4.21667	6.61191
TCGA_TCGA-HT-7608	6.66	2.35027	1.78887	1.72813	4.92829	4.31703	2.32645	3.00341	5.77712	4.84365	5.63448	5.46586	3.23108	3.5362	3.4878	3.11673	5.8936
TCGA_TCGA-DU-6406	6.31298	2.85887	1.78066	2.85631	5.87919	5.13032	2.4666	2.9672	6.63733	5.59211	5.7852	5.83049	4.52188	4.38707	0.763076	3.63225	6.78464
TCGA_TCGA-HT-7469	7.17985	2.46245	1.24312	3.4417	5.81952	5.47358	3.83567	4.29555	6.35017	5.54886	6.25365	4.74213	4.80164	4.71123	4.33231	4.81967	6.78999
TCGA_TCGA-VM-A8CF	5.10156	2.37509	0.924337	1.35768	3.41498	5.29179	2.55363	3.76326	4.76124	3.16492	5.0013	4.73695	3.48362	3.25308	4.07987	2.59812	4.73491
TCGA_TCGA-DB-A75M	5.75072	2.91278	1.43066	1.8659	4.34367	4.44715	2.63614	3.21466	5.51665	4.31373	5.70869	5.50831	3.91437	3.49765	1.82699	3.64376	5.84735
TCGA_TCGA-S9-A6U9	5.84949	3.9971	1.92039	2.25342	4.15875	4.73683	2.32544	3.08876	5.29123	4.19436	5.67554	5.42221	3.96236	3.90189	3.94316	3.60873	5.4951
TCGA_TCGA-DH-5143	6.11294	3.34685	1.3113	2.12967	4.81381	4.77084	2.22372	3.11391	5.84521	4.99351	5.90899	5.6771	4.1561	4.34065	3.28546	3.73491	5.69582
TCGA_TCGA-FG-7641	6.1019	1.58561	2.00032	2.50968	4.92575	4.18032	3.01684	3.42046	6.14559	5.29138	6.02952	5.82216	3.74013	5.65116	2.81552	3.85393	5.92601
TCGA_TCGA-E1-A7YQ	6.92777	4.51342	1.75038	2.64722	5.42769	4.61451	3.50852	3.74159	6.57575	5.29499	5.62169	5.15548	4.553	4.69168	3.90458	3.71837	5.98091
TCGA_TCGA-06-2565	6.62282	2.61549	1.79581	3.18822	5.84995	5.29726	3.27381	3.68665	5.90982	4.73614	5.80668	5.97685	3.34174	4.78801	1.04498	3.87801	6.7349
TCGA_TCGA-06-2562	6.4561	2.70584	1.66691	2.86873	6.12654	5.03311	2.65504	3.58549	6.27256	5.45291	5.52286	5.73645	3.28863	4.72141	1.51674	3.38195	6.57146
TCGA_TCGA-14-2554	6.79853	2.39259	0.850738	3.00227	5.19468	5.62817	2.62731	3.67213	6.21842	4.79106	5.84229	5.53281	2.90596	3.6751	1.28824	3.32224	6.21148
TCGA_TCGA-DU-7301	6.58126	3.07045	0.927714	2.75204	5.08683	5.1009	2.23222	3.48987	6.83808	5.14649	5.76714	5.87094	4.2793	3.63206	1.64617	4.22111	6.24432
TCGA_TCGA-S9-A7J0	5.83641	1.95311	1.50594	2.98579	5.52882	5.11434	2.88549	3.34906	6.51915	5.13102	6.2332	4.97689	4.06854	4.75007	2.68125	3.63435	5.93182
TCGA_TCGA-HT-7610	5.39638	3.1138	1.96159	2.29706	4.77899	4.3286	2.45587	2.4837	6.40789	5.25949	5.88635	5.72682	4.0251	5.83224	1.04168	4.10899	6.12385
TCGA_TCGA-DB-A4X9	6.01265	3.59782	1.39994	2.33393	4.51028	5.66817	2.97095	3.47105	6.45263	5.21331	5.61969	5.671	4.27532	4.34003	3.78424	3.91673	6.01245
TCGA_TCGA-P5-A737	5.44347	1.9347	1.32507	2.13008	4.28506	3.93214	2.07389	2.84944	5.1836	4.17314	5.48887	5.18689	3.06163	3.33937	2.6364	2.71618	5.12506
TCGA_TCGA-HT-8558	5.15867	2.09428	1.51869	1.7922	4.158	4.01548	2.50041	2.391	6.07896	5.29614	6.05873	5.89954	3.64393	6.53529	1.10842	3.76994	5.81582
TCGA_TCGA-HT-8015	5.37633	2.92522	1.61179	2.02842	4.33325	4.30414	2.32059	2.79746	5.85816	4.66335	5.8418	5.34933	3.64496	6.37591	4.56783	3.6376	5.57234
TCGA_TCGA-06-0744	5.77647	2.09581	1.15133	1.85962	5.03142	4.82143	2.47515	3.44924	5.4738	4.25256	5.25455	5.18636	2.85193	4.13267	1.1669	2.84825	6.32622
TCGA_TCGA-HT-A616	5.5332	3.28193	1.4279	1.63092	4.27678	4.5415	2.33628	2.4211	6.25054	4.57881	5.59821	5.62292	3.21997	5.63943	2.12613	3.06818	5.50807
TCGA_TCGA-DU-6408	5.54033	3.93814	1.49049	1.95897	4.95795	4.497	2.62951	2.99837	5.82094	5.09023	5.30315	5.5886	4.03767	4.1829	1.84184	3.6987	5.50813
TCGA_TCGA-CS-6670	5.62912	1.42639	1.95774	1.85005	4.74841	4.13139	2.3843	2.79994	5.84991	4.50944	5.27673	5.438	3.26559	3.99774	2.86137	3.17896	5.57701
TCGA_TCGA-FG-5962	5.87807	2.84059	1.74355	2.32002	4.9862	4.39328	2.4571	3.1764	6.26181	5.35445	6.0134	5.80648	3.5394	5.56876	3.23112	3.57942	5.93585
TCGA_TCGA-06-0645	6.32849	3.48709	1.35308	2.61613	5.6925	4.87991	2.10469	3.23497	6.15564	4.74249	5.32376	5.3664	3.44553	4.06925	3.54331	2.90402	6.32043
TCGA_TCGA-DU-A7TB	5.8117	1.82491	1.77547	2.43486	4.15131	3.70568	2.24917	2.93873	5.24158	4.02648	5.94005	6.03425	3.8764	3.5556	4.83771	3.68471	5.32051
TCGA_TCGA-S9-A6TV	6.95439	3.08198	2.08187	2.72522	5.46032	4.81271	2.77657	3.5598	6.29957	4.94621	6.06222	6.04772	4.56765	4.29431	4.53844	3.41586	6.42877
TCGA_TCGA-DU-5855	6.37219	3.90726	1.55818	2.89779	4.84266	4.80973	2.50492	3.0409	6.4294	5.09321	5.79343	5.65032	4.3318	4.4048	3.3555	4.07671	5.9019
TCGA_TCGA-06-5410	6.37692	4.42942	0.924337	2.61098	5.96907	5.20554	2.24675	3.39663	6.04102	4.77531	5.36589	5.80222	3.33485	4.20101	1.09095	3.19299	6.27511
TCGA_TCGA-DU-A76K	5.63917	1.98454	1.37523	1.33332	4.76429	4.50491	2.46324	2.67656	6.03157	4.19905	5.73479	5.3236	3.37646	4.72983	0.791927	3.51512	5.45202
TCGA_TCGA-14-0871	5.25914	0.93749	1.85496	3.42696	5.73713	3.59844	3.18622	4.71944	6.88923	5.33126	6.22042	6.17634	3.18773	4.9825	5.94782	3.90718	6.55159
TCGA_TCGA-DU-7010	6.77211	2.12598	1.33857	2.84894	6.13833	4.70133	2.78921	3.14876	5.97023	4.85389	6.30872	5.24602	4.97516	4.56622	6.27589	4.22059	5.93294
TCGA_TCGA-TM-A84F	5.92025	3.41916	1.34748	2.07766	4.80142	4.4594	2.41152	3.38239	5.86319	4.21208	5.31318	5.43067	3.79957	4.24197	3.59337	3.18493	5.90741
TCGA_TCGA-FG-A70Z	6.03006	2.90586	1.07368	2.17546	5.48766	4.75371	2.11633	3.24671	6.47215	5.03163	5.89882	5.7887	3.76704	4.61823	1.55496	3.38949	5.97163
TCGA_TCGA-FG-A87Q	6.41691	3.63711	1.05862	2.33152	5.01364	4.80902	2.87085	3.24837	6.13717	4.68456	5.47275	5.58053	4.08317	4.04515	1.4282	3.79511	6.00134
TCGA_TCGA-FN-7833	6.37494	3.99065	1.83297	3.04855	5.61493	5.12061	2.65224	3.28673	6.04059	4.65404	5.83869	5.65775	4.47541	4.20463	3.54379	4.18393	6.28623
TCGA_TCGA-E1-5319	6.60206	0.970651	2.26121	2.66558	5.34694	4.47363	2.59768	3.11179	6.13451	5.07729	5.92524	5.93485	3.87036	3.29384	3.81678	3.62524	5.45456
TCGA_TCGA-DU-5853	5.91464	3.736	1.48739	2.83658	4.86525	4.74571	2.71655	3.13792	6.02746	4.79824	5.42142	5.63202	4.16772	4.39349	2.94873	4.11425	5.98632
TCGA_TCGA-19-2625	5.85037	1.37432	0.530485	1.66482	4.02052	4.90265	2.24303	3.33449	5.5723	4.86432	5.57753	4.56975	3.84056	2.8245	5.701	3.26869	5.28101
TCGA_TCGA-TM-A84T	5.76919	2.9825	1.77643	2.58068	4.53063	4.45303	2.77888	3.14079	5.72541	4.31946	5.82618	5.53909	3.95624	4.23127	2.46304	3.9705	6.02301
TCGA_TCGA-06-0686	5.8145	2.17477	1.40638	2.65432	5.20355	4.32767	2.54159	3.47686	6.14602	4.37043	5.6812	5.88861	2.92255	3.94218	7.24924	3.01669	6.31321
TCGA_TCGA-HW-8322	5.77739	2.04616	2.12864	3.00549	5.43443	4.40395	3.16305	3.17577	6.5727	5.04422	5.51352	5.86554	3.41427	3.97273	1.90814	3.24703	6.25009
TCGA_TCGA-F6-A8O4	5.65407	2.07609	1.60736	2.06175	4.21787	4.76142	2.76465	3.15924	6.39917	4.03696	5.99993	5.43461	3.87718	5.11442	3.03879	3.83633	5.73068
TCGA_TCGA-E1-A7YD	5.38576	1.84504	1.34307	2.5575	4.86753	5.11364	2.84615	3.60381	6.18622	4.98339	6.50204	5.36124	3.73271	4.31232	5.93617	4.33675	5.41868
TCGA_TCGA-HT-7606	5.9997	2.46676	1.92194	3.10046	5.83663	5.18681	2.61262	3.09358	6.57842	5.32382	6.49914	6.29429	3.93853	4.73435	5.16119	4.49369	6.02991
TCGA_TCGA-27-1832	6.83822	2.77452	0.520226	2.23819	4.75311	5.73678	2.7306	3.71569	6.09021	4.68394	5.52752	5.37199	3.56536	3.80859	1.49079	3.19463	5.53271
TCGA_TCGA-CS-6186	7.10939	2.272	1.09733	2.22291	5.89015	4.73642	3.07748	3.47156	7.06009	5.28789	5.55827	6.09015	4.32832	3.38168	1.9955	4.47171	6.50055
TCGA_TCGA-VM-A8CB	6.32264	0.938695	1.82795	2.19947	4.87043	4.44535	3.82339	4.691	6.21877	4.41653	6.62267	6.04156	3.11856	4.31318	3.51289	2.96005	5.58595
TCGA_TCGA-06-5859	7.18834	3.18677	0.931084	2.54895	6.13691	5.71648	3.04684	4.00928	7.22636	5.492	6.10508	5.26391	4.3567	4.04705	1.85554	4.04018	6.02937
TCGA_TCGA-VM-A8C9	4.80833	3.31984	0.532067	1.70644	3.78744	4.85523	2.11425	3.05547	5.1016	2.59643	5.46314	5.23496	2.95163	2.60365	4.58567	2.4256	5.66219
TCGA_TCGA-WY-A85C	5.87796	2.39831	1.83493	2.6529	4.11846	4.82726	2.64146	3.58232	5.31212	4.54982	5.34032	4.97545	3.69237	4.05569	4.37984	3.41547	5.78379
TCGA_TCGA-DU-7006	7.31476	4.01974	1.23931	3.87934	6.06592	4.59568	3.0501	3.41648	7.34304	5.10834	5.66599	5.59668	4.40619	4.83206	0.714616	4.09508	6.59378
TCGA_TCGA-06-0190	6.41884	3.61002	1.0016	2.9911	5.54307	4.68606	2.17072	3.26368	5.96395	4.83946	5.49534	5.26572	3.80883	4.81072	4.97217	3.09976	6.55271
TCGA_TCGA-26-5132	7.04586	2.38881	0.973222	2.72454	5.24549	5.22248	2.51706	3.6065	6.23726	5.11625	5.63585	5.3966	3.82793	3.53242	7.27785	3.47316	6.41854
TCGA_TCGA-27-1834	6.63191	3.6772	0.806224	2.75493	5.64143	5.33602	2.82144	3.82308	6.56531	5.4273	5.54918	5.97509	4.24415	4.47266	1.55025	3.52206	5.49365
TCGA_TCGA-28-5209	7.04888	2.62786	1.64562	2.99244	5.91164	5.44471	2.28223	3.49001	6.99323	5.63891	5.97315	5.90296	3.96709	4.25006	0.759334	3.63325	6.8077
TCGA_TCGA-S9-A6U1	5.92695	3.22953	2.14555	2.67085	5.07197	4.58278	2.6002	3.37112	6.17677	4.84948	6.12663	6.09467	4.2342	4.05048	2.81131	4.05486	6.39311
TCGA_TCGA-TM-A84O	6.84926	1.96202	1.86363	2.58098	4.53803	4.30702	3.06351	3.43527	5.89026	4.74623	5.93319	5.92093	3.08261	4.47771	3.82949	3.15274	5.82364
TCGA_TCGA-HT-7884	5.84959	2.20463	2.11344	2.52824	4.57666	4.22649	3.00682	3.22917	5.71337	4.38377	5.64407	5.42932	4.24873	4.19386	0.917895	3.9838	5.98335
TCGA_TCGA-HT-7467	5.87315	1.83652	1.65998	2.17248	4.64261	3.69225	2.35508	2.80312	5.62677	4.73208	5.38114	5.54795	3.6124	5.18516	1.25817	3.31428	5.6992
TCGA_TCGA-S9-A6WE	6.13623	1.7921	2.35237	2.32174	4.88816	4.31447	2.84786	2.95781	6.04397	4.63606	5.9173	5.93157	3.12788	4.07376	4.37454	3.26412	5.90282
TCGA_TCGA-HT-7692	4.93413	1.77608	1.72055	1.95529	3.24612	4.09469	2.47035	3.06723	5.34554	3.96458	5.64428	5.26055	2.35222	3.16954	3.843	2.75656	5.28874
TCGA_TCGA-HT-7485	6.94118	3.10372	1.57326	2.36656	5.27168	4.60635	2.79246	3.3829	6.1469	5.06519	5.42895	5.71988	4.74099	3.67324	3.45951	4.00305	5.98639
TCGA_TCGA-06-0168	6.3524	2.68243	1.09338	2.18712	5.33924	4.42113	1.95741	3.25098	5.81906	4.71778	5.40676	5.44604	3.79379	3.88643	6.14621	3.3475	6.14353
TCGA_TCGA-DB-5274	5.04854	1.17742	0.807746	1.40764	4.01358	4.45249	2.64784	3.867	5.42772	2.82126	5.78257	5.39049	2.62199	3.08928	3.35731	2.26609	5.14781
TCGA_TCGA-19-2624	5.89053	0.928948	1.9345	2.95378	4.65276	4.80413	2.81538	3.73362	6.18097	4.87216	6.83024	5.66789	3.45591	4.75514	7.28128	3.51413	6.47256
TCGA_TCGA-26-1442	5.85123	2.92189	1.59527	2.16955	4.54097	4.62752	2.61786	3.28863	5.69896	4.67363	5.65885	5.31276	3.53662	4.40065	3.2647	3.77674	5.91678
TCGA_TCGA-TQ-A7RQ	5.63349	1.7305	2.72566	2.47421	4.6289	3.84105	3.33447	3.41913	5.92795	4.69383	6.01042	5.3716	3.45957	4.56873	3.90098	3.30296	6.33866
TCGA_TCGA-CS-4938	6.23752	2.78689	1.15625	1.86056	4.93453	4.99876	2.30543	2.99451	6.0338	4.74978	5.06919	5.52844	4.28641	2.7962	2.691	3.9131	5.11704
TCGA_TCGA-HT-7680	6.82847	4.35166	1.45463	2.63353	5.29966	5.33184	2.72952	3.36247	5.78921	5.0334	5.13157	5.52667	4.74266	3.27573	3.64529	4.36754	5.90446
TCGA_TCGA-15-0742	5.99471	1.56453	0.893216	1.85183	5.16805	4.76539	2.69068	3.70545	6.14367	4.52387	5.67383	5.52334	3.3383	3.476	0.894329	3.00038	6.34258
TCGA_TCGA-RY-A83X	5.91429	1.59274	2.19905	2.1711	4.87798	4.30527	3.24948	3.52787	6.31908	4.79761	6.21208	5.82749	3.56288	3.70016	3.35232	3.31447	6.28768
TCGA_TCGA-HT-A614	6.06724	2.75491	1.18713	2.22387	4.53261	4.84561	2.6296	3.58371	5.82315	4.38871	5.5736	5.72796	3.98407	4.31233	4.15687	3.72019	6.2226
TCGA_TCGA-DU-7302	6.32978	1.93694	2.28918	2.89425	5.6124	4.77735	3.16456	3.02784	6.5369	5.51389	6.31849	5.83783	3.92681	6.3669	1.72515	4.21066	5.78451
TCGA_TCGA-CS-6290	6.30967	4.16921	1.14987	2.40404	4.80796	4.65889	2.57125	3.30588	5.5519	4.67527	5.73505	5.51714	4.16024	3.63116	3.21292	3.81208	5.98735
TCGA_TCGA-HT-7881	5.85409	2.41786	1.95331	2.18358	4.76442	3.88973	2.75138	2.88872	5.99907	4.94739	5.54145	5.80036	4.06849	5.77752	0.78927	3.58341	5.72979
TCGA_TCGA-28-5216	6.54693	2.18573	1.23028	3.01708	5.8306	4.95185	2.12738	3.73487	5.92368	4.98784	6.3799	6.55163	3.98063	3.89945	0.938519	3.44431	5.78991
TCGA_TCGA-HT-A74K	4.93418	1.52159	0.708649	1.26338	4.29047	3.91659	2.14988	2.65364	4.93462	2.72962	6.03877	5.26685	2.44833	2.84389	3.07445	2.1961	5.4364
TCGA_TCGA-HW-7486	6.21117	2.72229	1.44766	2.53313	5.12639	4.04566	2.65355	2.94613	5.97728	4.76439	5.59362	5.96149	4.21442	3.37865	2.15801	3.4102	6.04046
TCGA_TCGA-S9-A6U6	5.51259	3.30375	2.24826	2.09913	4.5982	4.95398	2.35789	2.75758	6.33376	4.5064	6.27413	5.68201	3.81932	4.60008	2.84527	3.72516	6.16426
TCGA_TCGA-FG-A4MW	5.76975	1.90406	1.60616	2.02864	4.79962	4.6227	2.3017	2.94608	6.16106	4.52262	5.66704	5.299	3.49494	4.5448	0.84034	3.2901	5.90033
TCGA_TCGA-DU-6392	5.70119	2.78152	2.28562	3.02604	5.70203	4.83942	1.8868	3.16597	6.28432	5.70728	5.65435	5.47627	4.07844	3.86322	5.43214	3.83411	6.28455
TCGA_TCGA-12-5299	6.81197	2.66173	1.1846	2.29644	6.09657	5.46527	2.23852	3.45047	6.92943	5.18102	5.65057	5.76645	3.43036	4.02759	2.31607	3.48271	6.79304
TCGA_TCGA-19-2629	6.20349	4.11347	0.97204	3.19838	5.01192	5.19672	2.29882	3.67493	5.87821	4.69275	6.17917	5.88645	3.50823	4.14087	5.90974	3.41122	5.8577
TCGA_TCGA-14-1825	5.7349	2.2015	1.46413	2.65853	5.82776	4.74784	2.32362	3.48851	6.21626	5.19642	6.05829	7.02486	3.3311	3.82606	2.13206	3.72206	5.72777
TCGA_TCGA-TQ-A7RH	5.23557	3.41544	1.70215	2.37266	4.31508	4.2291	2.80093	3.25237	5.92271	4.22103	5.27617	4.71463	3.89472	3.83796	4.55448	3.42966	5.88801
TCGA_TCGA-DU-6405	6.90528	2.86623	1.78007	2.91162	5.69836	4.97382	2.79543	3.26276	7.08991	5.35235	5.8383	5.79988	4.62278	3.88335	0.708125	4.39277	6.56631
TCGA_TCGA-FG-5963	6.13997	2.76256	1.70644	3.50099	5.71792	4.88031	2.58844	3.32594	6.25307	5.22561	5.76216	5.91734	4.04266	5.02052	1.88669	3.77475	6.00026
TCGA_TCGA-DB-A75L	5.69952	2.674	2.00203	1.17747	4.57878	4.782	2.57692	3.14352	5.82663	4.86783	5.79267	5.67782	3.78775	4.85411	2.35494	3.63517	5.97486
TCGA_TCGA-HT-7471	6.41173	2.4217	1.62664	2.8509	5.54136	4.51482	3.17255	3.62877	6.32843	5.29265	5.78623	6.10534	3.7734	4.12737	3.26582	3.30017	6.45513
TCGA_TCGA-DU-5849	5.82493	1.86293	1.54182	2.17352	4.86414	4.17773	2.36282	3.15323	6.20345	4.95338	5.7249	5.48133	3.61797	5.0955	1.93811	3.40508	5.88966
TCGA_TCGA-DU-8165	7.49499	4.01605	1.45264	4.32413	6.21355	5.23951	2.90459	3.97258	6.5384	5.51384	6.6907	5.35503	5.4421	4.98724	6.07945	4.81033	6.00234
TCGA_TCGA-DU-6403	5.87872	2.72934	1.74591	2.7737	5.41463	4.47529	2.14664	2.83739	5.91963	4.965	5.88577	5.45653	4.32902	4.30366	2.79049	3.73055	5.66168
TCGA_TCGA-E1-A7Z3	5.77493	2.52303	1.74213	1.91916	4.88774	4.14195	2.32649	2.59968	6.26212	4.7144	5.88776	5.30032	3.56903	5.40876	2.10053	3.58213	5.88593
TCGA_TCGA-VM-A8CA	5.61021	2.09686	1.52085	1.48562	4.32305	4.53938	2.43154	3.37633	5.3998	3.39059	5.78954	5.24656	2.56131	4.80713	3.50142	2.73981	5.50029
TCGA_TCGA-DB-A4XB	6.12256	3.51148	2.20371	2.89502	5.18129	5.15059	2.8235	3.42305	6.32052	5.18934	6.09234	5.7887	4.59446	5.30194	3.11622	4.42842	6.46416
TCGA_TCGA-FG-8186	6.12277	4.00034	2.20815	2.30895	5.57706	4.79108	3.09743	3.26977	7.03883	5.12999	6.03619	5.91533	3.52554	4.28887	2.29275	3.37674	6.34414
TCGA_TCGA-P5-A5EX	7.33626	3.43719	1.21484	2.7139	5.14167	5.1911	2.4821	3.62137	5.89372	4.79251	5.19791	5.52805	3.42095	4.15746	4.12091	2.78827	5.3876
TCGA_TCGA-FG-A710	5.698	2.61606	1.56077	2.37832	5.0566	4.24983	2.71344	3.20011	5.84569	4.34151	5.66666	5.69851	3.14318	4.74382	3.56862	3.08165	5.98666
TCGA_TCGA-HT-8012	5.72836	1.82848	2.50578	2.60144	4.81475	4.27312	3.46654	3.24708	5.8885	4.48333	5.68387	5.49761	3.28684	4.07648	1.69972	3.25518	6.15657
TCGA_TCGA-DB-5277	6.12829	1.91455	1.11664	2.7057	6.12372	4.76269	3.04346	3.39768	6.256	5.80616	6.02022	5.14091	4.40381	4.00107	2.12219	4.17901	6.45628
TCGA_TCGA-TM-A84L	6.1556	3.75608	1.47476	2.5323	4.78049	4.47067	2.83438	3.09255	6.3305	4.45078	5.70238	5.52378	4.06851	4.19538	3.75986	3.65122	5.93904
TCGA_TCGA-HT-A74L	5.97745	3.40425	2.49947	2.57832	5.22258	4.50176	3.21933	2.90104	6.67318	4.9308	5.89152	5.72962	3.52513	3.74412	1.49258	3.59852	6.10485
TCGA_TCGA-FG-A711	5.51049	2.72431	1.56638	1.82741	4.36183	4.63139	2.81209	2.74731	7.0068	4.40599	6.38811	5.83615	3.66474	4.57013	2.51682	3.4948	5.97425
TCGA_TCGA-P5-A731	5.8863	2.23293	1.37683	1.86394	4.45984	4.29655	2.37717	3.28115	6.26898	4.44332	5.44387	5.53509	3.65861	4.46128	4.09683	2.93435	5.65144
TCGA_TCGA-E1-5305	6.23478	2.43523	1.9494	2.77823	5.47319	4.67968	2.6457	3.00771	6.02394	5.0875	6.01567	5.57895	4.24242	4.53072	2.75626	4.40987	5.82736
TCGA_TCGA-DU-6395	5.84195	2.30344	1.11366	1.84181	4.59029	4.3809	2.37073	2.62007	6.03116	4.28388	5.54465	5.48714	3.8544	2.568	2.71453	3.67362	5.80164
TCGA_TCGA-P5-A736	5.93293	3.24834	1.11059	1.76988	4.36331	4.48103	1.95615	3.09556	5.34436	3.99761	5.09032	4.97853	3.79429	3.47131	3.38058	3.07975	5.25723
TCGA_TCGA-P5-A5F0	5.08554	1.85552	2.01293	2.07007	4.89754	4.00576	2.87421	2.98041	6.40691	4.88593	5.76763	5.67724	3.10038	5.49279	3.08158	3.3027	5.97053
TCGA_TCGA-VM-A8CH	5.74499	2.70561	2.24685	2.53931	4.81316	4.56677	2.77419	3.36264	5.83232	4.46875	5.96581	5.4225	4.1803	4.27619	3.56012	4.02485	5.94584
TCGA_TCGA-S9-A7J1	6.26512	2.10318	2.16745	2.38093	5.19301	4.33849	3.14646	3.24535	6.05887	4.96922	5.85063	5.95743	3.65206	3.74636	3.5117	3.28033	5.32401
TCGA_TCGA-P5-A77X	6.01591	1.23785	1.61578	2.06546	4.62662	4.32252	2.82685	3.46902	5.5706	4.43647	5.66197	5.67942	3.12082	4.78533	3.00031	2.9891	4.70504
TCGA_TCGA-06-0130	6.28934	3.73718	0.551879	3.22181	6.04728	4.49118	3.00741	3.39539	6.62982	4.50206	5.66498	5.4119	3.79893	5.56933	7.31266	3.25325	6.09492
TCGA_TCGA-DU-6400	6.18162	1.54861	1.79951	2.75078	4.93366	4.38336	2.73135	3.49671	6.01492	4.90604	6.05165	5.90953	3.57085	4.59322	2.7488	3.25481	6.18388
TCGA_TCGA-DU-7309	5.25797	3.2552	1.7695	2.08151	4.73162	4.16328	1.97853	2.38615	5.85605	5.04151	5.71696	5.47784	3.70082	5.11692	2.23077	3.75212	6.0389
TCGA_TCGA-76-4929	6.55062	1.98741	1.57699	2.68017	6.15725	5.49282	2.58949	3.81842	6.372	5.32422	5.83518	5.55803	4.60978	3.94217	0.911514	3.88135	5.87221
TCGA_TCGA-06-5412	6.51942	4.06605	0.882732	2.66046	5.23869	5.22666	2.3816	3.4429	6.37836	5.21064	5.41446	5.79292	3.68125	4.59416	1.5432	3.08612	6.32411
TCGA_TCGA-76-4926	6.487	2.18982	1.28042	2.31816	5.50105	5.88638	2.79532	3.12091	6.46818	5.12142	5.66006	5.9832	4.08785	4.24161	0.853899	3.78287	6.31539
TCGA_TCGA-HT-7620	6.42879	2.91136	1.53467	2.69663	4.83816	3.9638	2.77727	3.26042	5.68461	4.58541	5.5384	5.60407	4.13087	3.62917	2.55939	3.38251	5.65469
TCGA_TCGA-12-0618	5.73739	1.30053	2.33841	3.11428	5.92905	4.66202	2.98595	3.52566	6.49343	5.27198	6.30927	5.26015	3.82771	4.49607	7.06196	3.80917	6.85322
TCGA_TCGA-TQ-A7RW	6.02793	4.32845	1.89071	2.75188	4.88501	4.78155	2.51391	3.35764	6.01168	4.73853	5.95762	5.88114	4.4211	4.60184	3.36733	3.79954	5.74676
TCGA_TCGA-HT-7475	5.66392	1.38011	1.50805	2.03501	4.46099	4.30381	2.07319	3.21553	6.59465	4.68582	5.62722	5.56204	3.60366	5.30281	1.86068	3.61411	6.05003
TCGA_TCGA-E1-A7YU	5.51038	2.14497	1.69249	1.80282	4.27899	4.34723	2.80924	2.84396	5.2894	3.97721	5.76193	5.11949	3.74263	4.14836	4.37437	3.64699	5.72767
TCGA_TCGA-DU-7008	5.64084	2.19807	1.90614	2.34412	5.31053	4.54922	2.56564	2.90239	6.53208	4.79535	6.09525	5.74309	3.78237	4.49154	3.06913	3.74283	6.23699
TCGA_TCGA-HW-A5KJ	5.29289	0.73719	1.30912	1.44356	3.49031	3.63438	2.57858	3.09666	5.10347	3.40548	5.08188	4.74124	1.90155	3.68967	2.8081	2.55451	4.86937
TCGA_TCGA-DU-7300	6.08411	2.0305	1.71056	2.60368	4.96528	4.52353	2.50038	2.84529	6.16434	5.1195	5.65844	5.74438	3.62789	5.28897	3.54453	3.48959	5.83547
TCGA_TCGA-P5-A5EU	6.92194	2.62817	1.3002	3.1154	5.72786	5.40289	2.71705	3.36631	6.56806	5.25579	6.078	5.20339	4.30166	4.83265	0.900279	3.48414	5.6796
TCGA_TCGA-E1-5322	6.40359	3.56206	1.99025	3.00005	4.95258	4.75845	2.63891	3.54146	6.02071	5.08705	6.18792	5.48308	4.12171	4.12842	3.0385	4.17921	6.47714
TCGA_TCGA-14-0789	6.83134	3.26489	1.03174	3.05552	5.89638	4.73721	2.19454	3.21767	6.21985	5.26898	5.37379	5.57783	4.25524	3.91716	1.9056	3.2522	6.27767
TCGA_TCGA-TM-A84J	6.54667	1.1133	2.72112	3.23172	5.3131	5.66582	2.87681	3.6319	6.59184	5.34748	6.43365	5.62413	4.11941	4.99935	3.94042	3.62526	6.88114
TCGA_TCGA-06-5417	6.51585	2.01388	1.23587	2.74633	6.23363	5.08446	3.2736	4.39196	6.61281	5.85377	6.17681	6.62233	4.16979	5.07962	3.5812	4.31689	6.56022
TCGA_TCGA-E1-5307	6.77308	3.29867	1.80046	2.94196	4.95835	4.86292	2.85456	3.60128	6.16392	5.42334	5.7961	5.6593	4.50526	5.02224	3.31799	4.63586	6.21925
TCGA_TCGA-QH-A6XA	5.80841	3.9725	1.47083	2.2517	4.57275	4.54523	2.47137	3.03368	5.93525	4.49532	5.68123	5.65719	3.7389	3.86242	1.28508	3.7014	5.82263
TCGA_TCGA-P5-A72Z	6.37158	0.648784	1.93793	2.63466	3.90803	3.75638	2.90375	3.03146	5.73382	5.19349	6.45982	6.19811	3.57868	3.93978	1.85528	2.92078	5.94969
TCGA_TCGA-QH-A6X9	5.70582	2.52049	1.68659	2.59342	4.57217	4.72497	2.48156	2.91788	6.58295	4.7589	5.74246	5.421	3.66117	4.5599	3.26563	3.87944	5.86384
TCGA_TCGA-DU-A7T6	5.61828	1.34964	1.94968	2.33304	4.24128	3.92661	2.50382	2.81032	6.10699	4.81256	6.03145	5.86721	2.96187	4.52393	2.08109	2.81008	5.99531
TCGA_TCGA-TM-A84M	6.06466	1.34001	2.31826	2.90169	5.36126	4.15817	3.34064	3.64658	6.26977	4.81229	6.12065	5.58646	3.45654	4.14332	3.04964	3.10464	6.19672
TCGA_TCGA-CS-4943	6.36227	3.5135	1.36493	2.80314	5.67355	4.74031	1.96053	3.42813	6.18362	5.49491	5.98438	5.86065	4.26433	3.79709	2.88148	3.99505	6.80672
TCGA_TCGA-P5-A733	5.63271	1.35072	1.42216	1.46751	3.6367	4.13538	2.06094	2.8265	6.41664	4.5273	5.70108	5.52831	3.43772	3.45707	2.52576	3.67949	5.66911
TCGA_TCGA-TQ-A7RI	5.80957	2.10755	2.31871	2.47946	4.9484	4.53392	3.13539	3.30946	6.38326	4.74492	5.66772	5.68418	3.66593	3.80162	2.77496	3.22838	5.9096
TCGA_TCGA-14-0817	6.07817	2.96124	0.627612	2.11555	5.49587	4.88047	2.7641	4.02944	5.69939	4.36012	5.22304	5.73967	2.50284	4.17101	2.28279	3.30342	6.31028
TCGA_TCGA-76-4925	6.42151	1.46973	2.00641	2.71532	5.92877	5.26888	2.41727	3.86497	6.53838	5.7766	6.1033	5.91547	4.07986	4.37653	0.987611	3.66931	6.86882
TCGA_TCGA-HT-8019	4.20577	1.9204	1.7319	1.20965	3.79798	3.72507	1.98024	2.06461	5.54729	4.48667	5.64385	5.36764	2.74631	6.16685	0.791011	3.19901	5.2758
TCGA_TCGA-DU-7009	6.43105	1.92554	1.69091	2.41767	5.25559	4.34189	2.68543	2.77098	6.66168	5.21754	5.74112	5.68285	3.71943	4.74813	1.98491	3.57991	5.88901
TCGA_TCGA-06-0187	6.40665	2.72439	1.34028	2.32103	5.53376	5.20888	2.05326	3.22689	6.36511	5.09955	5.62078	5.38069	4.25168	3.97057	1.07612	3.57149	6.68668
TCGA_TCGA-HT-7482	6.47242	3.53058	1.21802	2.6965	4.57497	5.04981	2.72719	3.58038	5.84406	5.00998	5.99782	5.41698	4.17786	3.68164	2.84846	4.02374	5.83093
TCGA_TCGA-FG-A60J	5.72708	3.73802	1.25132	2.20677	4.74304	4.63074	2.781	3.08703	5.99887	4.69795	5.92334	5.57329	4.05813	3.73943	2.93331	3.71291	6.05214
TCGA_TCGA-26-5135	5.98179	2.35353	1.80788	2.22402	5.31801	4.70372	2.17665	3.05337	5.98102	4.64941	5.61037	5.4149	3.60898	3.98178	6.9713	3.17102	6.37463
TCGA_TCGA-HT-A5R5	6.60183	3.90568	1.77284	1.92571	4.84735	5.13351	2.25345	2.93725	6.28142	4.78409	5.45181	5.46034	4.27616	4.29056	3.30374	3.42131	6.0061
TCGA_TCGA-06-2564	6.64295	2.93751	1.41904	3.1806	6.1098	5.00087	3.08511	3.28935	7.0812	5.55636	5.77668	5.6881	4.11769	4.62859	1.74989	3.97543	6.53981
TCGA_TCGA-06-5418	6.43581	2.89939	1.08546	2.82824	5.9517	5.20996	2.7944	3.58853	6.88583	5.26646	5.46241	5.8242	3.8934	4.1487	1.58067	3.46675	6.65066
TCGA_TCGA-DB-A64V	5.91997	2.07968	1.2913	2.0048	4.28473	4.36544	2.82348	3.62313	5.51971	3.64224	5.40414	5.74241	3.3373	3.66958	3.5206	2.59956	5.62274
TCGA_TCGA-DU-7290	7.11924	4.25701	0.829694	3.15855	5.44496	5.55938	2.73953	3.89493	6.19042	5.7414	5.23609	5.71964	5.94858	4.31014	3.5493	4.07212	5.51036
TCGA_TCGA-FG-8181	4.62148	3.56974	1.96145	1.59066	4.02338	4.22276	2.06793	2.03033	5.99593	4.78154	5.8726	5.40096	3.13725	6.57209	0.559635	3.1724	5.47603
TCGA_TCGA-06-0649	6.49447	3.31551	0.889569	2.63743	5.25058	5.20397	2.69056	3.80039	5.91412	4.51305	4.99698	5.60227	3.5149	3.67325	1.71046	3.57386	5.39551
TCGA_TCGA-QH-A86X	5.59923	1.75863	2.10621	2.23774	4.83125	4.30696	3.10402	3.20589	5.95646	4.65765	5.89095	5.7759	3.17212	4.02834	2.30084	3.0903	6.10373
TCGA_TCGA-HT-A5R9	5.43185	0.917607	1.37941	2.74207	5.12168	4.15808	2.0816	2.95564	6.34372	4.64224	5.3958	5.42371	2.73877	4.24258	2.49654	2.9189	5.83734
TCGA_TCGA-DU-5854	6.4031	3.37832	1.3711	2.94576	5.40815	4.38208	2.62756	3.18167	6.32325	5.09229	5.66466	5.58287	4.28287	4.00388	1.10791	4.0774	6.29198
TCGA_TCGA-HT-7607	5.64517	2.30465	1.65726	2.13122	5.10155	4.58621	2.44638	2.67426	6.20686	5.46886	5.98165	5.71419	3.74508	6.17256	1.42299	3.88843	5.84807
TCGA_TCGA-HW-A5KK	6.12706	3.85221	1.35627	2.63944	4.64338	4.63888	2.59654	3.70658	5.38279	4.26178	5.24234	5.44306	4.02003	4.19674	1.13929	3.38708	5.46061
TCGA_TCGA-DU-7019	6.52211	3.42691	1.67484	1.66274	5.2477	4.66532	2.52776	3.3203	6.27248	5.50387	6.36346	5.97136	4.11725	4.45347	2.61273	4.6464	5.83825
TCGA_TCGA-DU-7007	7.12463	3.17862	1.32853	3.55837	5.76225	5.03343	2.82732	3.67663	6.06558	5.43496	5.02499	5.74308	4.66824	4.54756	4.64139	4.21433	6.2956
TCGA_TCGA-28-2510	5.56576	2.60428	1.72754	1.95095	4.75379	4.31529	2.49756	2.94236	6.06167	4.92626	5.92549	5.93368	3.58141	5.46323	1.32582	3.38276	5.83691
TCGA_TCGA-DB-A75K	5.71504	2.6471	1.80604	2.06687	4.82596	4.11625	2.75674	3.3244	5.64608	4.3368	5.90353	5.79266	3.32929	3.54823	3.8524	2.81492	6.16588
TCGA_TCGA-VM-A8CD	6.42395	2.65302	1.33807	2.2275	5.82188	5.54735	2.6771	3.07517	6.6694	5.43952	6.36992	5.79082	4.28828	4.61946	1.11827	3.7331	5.79131
TCGA_TCGA-14-0736	5.6887	2.13536	0.651965	2.00431	5.28647	5.11871	2.84344	3.86439	5.30808	4.14827	4.60478	5.3835	2.23554	4.28756	2.9686	3.18905	5.19137
TCGA_TCGA-HT-7604	6.67105	2.89937	1.75251	3.05632	4.96812	5.28685	2.9929	3.53163	6.68429	5.42718	6.09533	5.87154	4.47564	4.04448	3.73287	4.22514	6.38628
TCGA_TCGA-DB-A64U	6.17021	2.53137	1.88518	2.73412	4.9647	4.53295	3.45236	3.85751	5.94487	4.71755	5.68399	5.78707	3.82255	4.01077	2.86828	3.47553	6.00284
TCGA_TCGA-VM-A8CE	6.02986	1.8048	2.14991	2.30559	5.04012	4.30406	2.97231	3.27829	5.612	4.48966	5.58666	5.7076	3.58651	3.7874	3.53993	3.19975	5.9154
TCGA_TCGA-S9-A6WQ	5.79967	3.11761	1.32889	2.20743	4.35812	4.36497	2.63479	3.33018	5.85091	4.11018	5.67549	5.79462	3.70972	3.62459	3.96738	3.25837	5.8695
TCGA_TCGA-FG-7636	5.86408	2.61534	1.33993	1.96913	4.49795	4.38697	2.49512	3.00689	5.89549	4.38396	5.32381	5.54623	3.97591	3.60328	3.33991	3.81691	6.09715
TCGA_TCGA-FG-5964	5.37507	2.52554	1.18001	1.94025	4.6552	4.16017	2.13969	2.66153	5.61909	4.3174	5.76204	5.46216	3.04875	4.07773	2.72038	2.71645	5.97722
TCGA_TCGA-06-0743	6.00643	2.28883	0.926496	1.98946	4.70155	4.89266	3.01989	3.78012	5.65792	4.19873	4.88068	5.14359	3.18823	3.81961	0.777482	2.82085	5.69846
TCGA_TCGA-DB-A64Q	6.55079	1.96138	2.40424	2.58466	5.69315	5.67987	3.48528	4.06426	6.81761	5.71835	5.85349	6.04104	3.72404	4.10296	2.96254	3.73961	6.06354
TCGA_TCGA-QH-A6CV	5.76794	3.67285	1.51003	2.17201	4.63207	5.1554	3.12285	3.57667	6.76233	4.4712	5.86658	5.57073	4.05834	3.8712	4.47001	3.42073	6.01579
TCGA_TCGA-P5-A5F2	6.16278	1.79726	1.96694	2.20367	4.00508	4.83042	2.82729	3.32054	5.78996	4.70274	6.01912	5.49746	3.85582	5.21291	3.14844	4.19917	5.25305
TCGA_TCGA-S9-A7QW	5.30787	3.15864	1.59515	1.75252	4.46637	4.68586	2.54143	3.21187	6.17462	4.25088	5.843	5.74225	3.33077	3.69289	3.37744	3.56137	6.10118
TCGA_TCGA-DU-A7T8	5.80407	3.21496	1.45038	2.16521	4.4319	4.36267	2.30615	3.33958	6.09488	4.34068	5.89182	5.49785	3.99485	3.96597	2.65008	3.39938	6.09982
TCGA_TCGA-06-2570	6.0053	2.83103	1.68926	3.03178	5.40311	4.83079	2.9215	3.51319	5.61056	4.85209	6.18995	5.79771	4.00633	4.39011	6.98161	3.48947	6.50374
TCGA_TCGA-06-0157	5.99219	2.9148	1.15819	2.43134	5.6617	4.63431	2.55081	3.28507	6.39416	5.10602	5.6057	5.48624	3.41622	3.75894	6.34886	3.58453	6.57643
TCGA_TCGA-HT-7609	6.01548	3.82755	1.69034	2.38659	4.86389	5.01198	2.49263	3.11075	5.75028	4.77448	5.44363	5.33756	4.06982	3.44041	2.81961	3.98047	6.02944
TCGA_TCGA-12-0821	6.71999	1.45214	1.03331	2.50933	4.95298	5.50302	2.72267	4.33025	6.57375	5.1516	5.90454	6.14026	3.71213	4.38978	1.00442	4.02462	5.92469
TCGA_TCGA-DH-A7US	6.08578	1.84103	1.75599	2.33216	4.81957	4.22957	3.28711	3.47232	5.74906	4.26891	5.74414	5.83845	3.5798	3.38339	2.98703	3.07259	5.91616
TCGA_TCGA-DU-7014	5.7054	2.13496	1.72969	1.9608	4.26111	3.93348	2.76433	3.10566	5.73143	4.56707	5.15377	5.2604	3.41737	3.70201	2.91844	3.27931	5.82561
TCGA_TCGA-HT-7688	5.69474	2.5343	1.44112	2.05896	4.75714	4.80578	2.76809	3.01805	6.45937	5.49357	6.08535	5.8956	4.00632	6.41942	2.3334	3.9707	5.91329
TCGA_TCGA-HT-A4DS	5.53582	3.49207	0.594133	1.46384	4.36958	4.98244	2.53882	3.78534	5.47639	2.63895	5.28971	5.56704	3.24646	3.67375	1.21221	3.08184	4.69238
TCGA_TCGA-E1-A7YY	4.81931	2.42758	2.04663	1.78196	4.35016	4.2096	2.65693	2.27462	6.31688	5.19944	6.58859	5.94884	3.27303	6.90991	1.35037	3.53048	5.96593
TCGA_TCGA-DU-A6S2	5.8322	1.53576	2.18347	2.33368	4.5724	3.90185	2.45428	3.0479	5.6	4.84263	5.93621	5.36505	3.68921	5.48083	1.97679	3.36442	5.45901
TCGA_TCGA-S9-A6TS	5.78055	2.55241	1.71927	2.33804	4.5395	4.31893	2.73681	3.89039	5.78962	4.53726	6.19707	5.85258	3.74169	4.663	4.84311	3.67883	6.12877
TCGA_TCGA-DB-5280	6.59545	2.84056	1.99058	2.874	5.30999	4.46457	2.9389	3.26008	6.54887	5.23687	6.04565	5.92031	4.73337	3.7729	4.97998	4.52495	6.36695
TCGA_TCGA-06-0174	6.12104	2.18066	1.70799	3.04757	5.56611	5.05198	2.29924	3.05944	6.50819	5.15906	6.09987	5.62912	3.64492	4.13013	7.10381	3.66145	6.77288
TCGA_TCGA-E1-A7Z2	5.83092	2.71058	1.6125	1.67897	5.24946	4.49487	2.26141	2.85314	5.87699	4.12645	5.85081	5.68114	3.60285	4.37419	0.790278	3.74344	5.25509
TCGA_TCGA-WY-A85B	6.04058	3.05852	1.33957	2.61858	4.68114	4.86349	2.58244	3.43183	5.91867	4.57562	5.09593	5.61631	3.92346	3.96135	2.78147	3.54761	5.89053
TCGA_TCGA-TQ-A7RS	5.85129	1.28505	2.19295	2.11084	4.61359	4.26594	3.28527	3.68969	5.67089	4.29156	5.98687	5.6375	3.22277	3.4869	2.92455	3.24249	6.03804
TCGA_TCGA-DB-A64L	5.98949	1.88403	1.30547	2.44925	4.82783	4.38475	3.13109	3.52546	6.4265	5.25664	6.12513	5.66961	3.37872	5.55833	3.84712	3.46113	5.58277
TCGA_TCGA-E1-A7YW	6.50042	3.22682	1.75517	2.62444	4.33055	5.04459	3.12479	3.53626	5.93654	4.75704	6.0921	5.16606	4.40216	4.35184	3.80203	4.23323	6.25977
TCGA_TCGA-28-5220	6.52885	2.92999	1.29322	2.45967	5.10339	5.91497	3.3778	4.12239	6.3446	5.30652	5.76709	5.52524	3.42764	4.18251	1.19267	3.89934	5.61823
TCGA_TCGA-DH-A7UU	5.84307	2.75041	1.29447	2.38966	4.55238	4.3054	2.43416	2.75085	5.54681	4.66664	5.78695	5.24316	3.8883	4.0898	1.90392	3.599	6.03042
TCGA_TCGA-P5-A5EZ	5.32934	2.46354	1.17165	2.23485	3.95732	4.02417	2.20186	2.93157	5.31946	4.00707	4.50565	4.87103	3.50172	3.99633	4.41918	3.30298	4.83219
TCGA_TCGA-FG-6690	5.86429	3.42476	1.90131	2.42825	4.56267	4.65494	2.39025	3.20542	6.22097	4.7119	5.54322	5.49641	4.40501	3.23516	3.28209	3.94603	5.80494
TCGA_TCGA-DU-7294	6.10851	2.038	2.23778	2.87037	5.34438	4.36788	2.59493	3.31653	6.43555	5.15549	5.97156	5.94737	3.63313	3.84688	3.47318	3.25757	6.38575
TCGA_TCGA-27-2526	6.11893	1.73094	0.913687	1.28704	5.16152	5.81954	2.67385	3.86723	6.53811	4.86606	5.17687	6.12031	2.40265	3.17598	7.19727	3.26787	6.30871
TCGA_TCGA-DB-A4XH	5.47022	1.5844	1.66553	1.85879	3.99594	3.79925	1.85281	2.23467	5.20868	4.05025	4.93347	5.13186	2.71587	3.52229	1.71639	2.83114	5.0392
TCGA_TCGA-QH-A6CX	5.63914	2.08064	0.908097	1.9003	4.42078	4.54683	2.12296	2.75885	6.31151	4.41494	5.79467	5.28484	3.3271	3.80107	0.698773	3.2654	5.68838
TCGA_TCGA-S9-A7J3	5.89519	2.18842	2.22631	2.75857	4.99975	4.21768	2.86384	3.1462	5.94832	5.02815	5.79858	5.87175	3.72449	4.05327	3.43964	3.33167	5.8948
TCGA_TCGA-DU-6394	7.08016	1.60276	1.75174	3.31351	5.43093	4.89184	2.60595	3.13521	6.5138	5.93446	5.99665	6.24834	3.77596	4.37658	4.41993	3.41409	6.35118
TCGA_TCGA-06-0221	5.33956	2.05204	1.7878	2.95387	5.38989	4.62123	2.59465	3.02636	6.5454	5.4794	6.1017	5.63739	4.52387	5.73899	1.24918	3.87972	6.464
TCGA_TCGA-HT-8010	5.40707	2.80374	1.85282	1.78435	4.64555	4.05582	2.26377	2.68924	5.80651	4.55592	5.27747	5.29775	3.06384	4.65159	2.15187	2.98765	5.45413
TCGA_TCGA-FG-A60K	6.1697	2.71105	2.31668	2.44324	4.96262	4.37168	3.53946	3.53057	5.9094	4.80901	5.81757	5.66852	3.44225	4.1363	2.61367	3.37743	5.98899
TCGA_TCGA-HT-8106	6.86449	4.02774	1.50677	3.28496	5.58593	4.97988	2.8737	3.49209	6.13315	5.14671	5.4319	5.8317	4.64928	4.85917	3.31007	4.04888	6.36615
TCGA_TCGA-WY-A85D	6.01491	2.78248	1.13155	2.00293	4.32678	5.01974	2.83309	3.35608	5.73266	4.02466	5.5252	5.5492	3.78318	3.61273	2.94897	3.60438	5.90751
TCGA_TCGA-06-0878	6.78769	3.78255	1.28716	3.10944	5.64299	5.14338	2.55835	3.53599	6.80141	5.30975	5.65505	4.94924	3.85027	4.31921	2.02708	3.38423	5.74946
TCGA_TCGA-HT-A61A	5.02239	2.05007	1.71353	1.72823	4.23663	4.16565	2.47253	2.51231	6.22549	4.91187	5.6815	5.7011	3.23357	6.05063	0.720019	3.52545	5.46087
TCGA_TCGA-12-3650	5.53626	1.81735	0.792765	2.09671	5.54309	5.02704	2.37904	3.32896	5.83811	4.97443	5.71825	5.72473	2.57592	4.0247	1.99354	3.15998	6.82763
TCGA_TCGA-E1-A7YJ	6.93985	3.3953	1.50971	2.70364	5.24556	5.27115	3.11888	3.38478	6.06329	5.1376	6.25554	4.96291	4.08877	4.67729	1.16091	3.8037	6.64832
TCGA_TCGA-P5-A72U	5.78524	2.11217	1.07393	1.62052	4.87268	4.33222	1.86346	2.84138	6.11417	4.33956	5.23125	5.25535	3.20111	3.69171	4.18968	2.97395	5.61641
TCGA_TCGA-P5-A781	6.0138	2.06145	1.78199	2.15152	4.61896	4.32623	2.81861	2.95564	5.86713	4.60219	5.49216	5.42832	3.39389	4.15021	3.48499	3.29558	5.54857
TCGA_TCGA-FG-A6IZ	5.3648	1.97162	0.844613	1.65608	4.21497	4.66714	3.03778	3.51567	6.09106	3.36207	6.19479	6.11161	2.54518	3.34476	2.28388	2.36241	5.96363
TCGA_TCGA-TM-A84Q	6.28136	2.8762	1.3494	2.62097	4.84487	4.79509	2.75117	3.26654	6.00501	4.73932	5.40817	5.81421	4.09879	4.41328	3.37812	3.98471	6.16032
TCGA_TCGA-08-0386	6.61972	2.27272	1.27878	3.0218	6.27219	5.18422	2.60457	3.38779	6.8203	5.95134	6.28333	5.65456	4.42213	4.25064	7.09868	4.22987	6.83243
TCGA_TCGA-CS-4944	6.59088	1.92898	1.27573	1.58146	4.3969	5.02852	2.71135	3.25816	5.94567	4.09517	5.52815	5.67693	3.60331	2.74996	2.60176	2.60312	5.15316
TCGA_TCGA-HT-7877	5.75921	1.89842	2.59733	2.21199	5.02296	4.11548	2.80899	3.33642	5.79251	4.89431	5.57477	5.49913	3.76346	4.55249	1.1906	3.47131	5.86196
TCGA_TCGA-S9-A7IZ	5.78052	4.21515	1.35273	2.17644	4.32355	4.8062	2.47882	2.94881	6.33162	4.99335	5.90833	5.43259	3.72678	5.02176	3.11606	3.55652	5.97084
TCGA_TCGA-QH-A6X5	5.82427	2.38219	1.77766	1.92777	4.50555	4.18621	2.77916	2.91104	5.5565	4.33198	5.79039	5.75291	3.31401	3.31676	3.66734	3.00484	5.74209
TCGA_TCGA-32-2634	6.22976	2.13314	1.44199	3.22504	5.71515	5.25791	2.75496	3.74069	5.90186	5.5452	5.88535	5.69378	4.29455	3.99959	6.58591	3.80746	5.82119
TCGA_TCGA-DU-7015	6.55522	3.78836	1.58455	2.76589	4.73463	4.76322	2.56287	3.18801	5.84586	4.85394	5.28816	5.50391	4.47439	3.73919	2.95264	3.89987	6.01326
TCGA_TCGA-WY-A85E	5.40209	2.63569	1.54144	2.20049	4.57074	4.79323	2.65343	3.25506	6.19011	4.46009	5.68302	5.145	3.34013	4.69561	3.34338	3.22215	5.78566
TCGA_TCGA-02-0055	6.34845	3.40984	0.810482	2.78829	5.75651	5.15877	2.56875	3.29611	5.9177	4.88571	5.66089	5.43177	3.68614	5.12296	7.2455	3.26387	5.94565
TCGA_TCGA-32-2638	6.68916	3.30209	1.5905	2.90615	5.34606	5.00176	2.56538	3.5296	5.90679	5.12543	5.37527	5.55683	4.07485	4.30364	3.96588	3.33714	6.58176
TCGA_TCGA-DU-A7TJ	6.9104	2.97431	1.79666	2.98951	5.929	5.21078	2.90066	3.36556	6.9341	5.6307	5.73119	5.98575	4.4036	4.25386	0.87469	3.71069	6.60118
TCGA_TCGA-FG-A70Y	5.70855	3.3868	1.45833	2.1385	4.45646	4.39833	2.49931	3.13521	5.69506	4.55789	5.85122	5.67662	3.71949	3.44544	3.67227	3.81948	6.06815
TCGA_TCGA-DB-5273	6.502	3.81797	1.56595	2.38631	5.10966	4.8638	2.33961	3.11393	6.07363	4.96523	5.58661	6.19768	4.20388	3.21721	2.81966	3.96142	6.19829
TCGA_TCGA-DU-8168	6.3692	1.2373	2.94715	3.55686	5.62486	4.71122	3.24638	3.65816	6.49494	5.49344	6.12844	5.21132	3.80995	5.24038	3.03645	3.72851	6.56687
TCGA_TCGA-HW-7491	5.95763	1.24708	1.83225	2.96518	5.92639	4.55984	1.96099	3.24336	6.4144	5.45775	6.13656	6.29232	3.71282	3.69572	3.19867	3.70064	6.44518
TCGA_TCGA-DB-A64W	5.44729	1.38893	1.87573	2.45282	5.487	4.96083	2.38613	2.92381	6.51839	5.25543	6.28294	6.0111	3.18723	5.88159	3.38505	3.38394	6.25136
TCGA_TCGA-HW-8320	6.3669	3.96034	1.86793	2.77917	4.82651	4.52436	2.9527	3.09113	6.04869	5.25848	5.9118	5.54162	4.51993	4.28276	3.11746	4.2369	6.40466
TCGA_TCGA-HW-A5KL	5.30532	2.45712	1.68363	2.13301	4.19278	3.96589	2.29484	2.46501	5.30023	4.12274	5.15067	4.94172	3.51829	3.55506	3.01675	3.27022	5.45664
TCGA_TCGA-19-1390	5.6797	2.30119	1.83101	3.58363	5.84218	4.37569	2.58797	3.32045	6.22422	4.93048	5.94048	5.49288	3.27866	4.25648	1.59015	3.32137	6.03948
TCGA_TCGA-DU-A6S3	4.86981	1.15824	1.10776	1.70534	4.27219	3.58615	2.24768	2.73715	5.28229	4.11008	5.54286	5.15023	2.77161	4.25723	2.71916	2.69481	5.2728
TCGA_TCGA-FG-8182	6.32382	4.27338	2.33092	3.09363	4.69281	4.57549	2.7033	3.43554	5.9395	4.96693	5.88273	5.71678	4.53635	4.35884	2.57687	4.23713	6.03415
TCGA_TCGA-28-2499	6.11183	2.10751	0.985359	1.91249	5.01403	5.00936	2.83591	4.48182	7.03586	5.10316	5.98453	6.22862	3.6611	3.73847	2.11622	3.7135	6.03201
TCGA_TCGA-14-1823	6.6919	2.41474	0.573804	2.97231	5.4148	5.1113	2.9073	4.4721	6.18383	4.34744	5.0912	5.31019	2.48745	4.14081	1.48372	3.48381	5.92351
TCGA_TCGA-FG-A713	4.90151	1.73325	1.52579	1.59054	4.16872	3.96884	2.22377	2.59284	5.73588	4.84953	5.9298	5.46502	3.45003	5.93535	1.03043	3.25744	5.32795
TCGA_TCGA-IK-8125	5.79342	2.20061	1.86085	2.23728	5.25956	4.03558	2.47512	2.8388	5.91725	4.86453	5.84812	5.72728	3.12128	4.97931	3.24624	3.38415	5.66237
TCGA_TCGA-HW-8321	6.20555	3.00078	2.37527	1.62394	4.89414	4.41906	2.75562	2.86328	6.15748	5.33142	6.33849	5.81625	4.23792	4.47583	4.06868	4.0886	6.44106
TCGA_TCGA-KT-A7W1	6.15313	2.02593	1.35499	2.78587	5.79795	5.09356	2.44344	3.38309	6.72154	5.40986	6.06976	5.83485	4.09414	4.54319	0.597819	3.69069	6.41066
TCGA_TCGA-HW-7493	6.0872	3.93093	1.73361	2.69575	5.02861	5.12726	2.09923	2.68238	6.35607	5.32086	5.68939	5.64678	4.42494	5.41613	2.39168	4.14297	5.91478
TCGA_TCGA-HT-8114	6.69674	3.68431	1.90422	2.66074	4.83854	4.72616	2.97153	3.24243	6.82861	5.18947	6.00099	5.91538	4.50683	4.43008	3.07886	4.25197	6.28785
TCGA_TCGA-HT-8113	4.95273	1.92213	1.828	1.73746	4.3033	4.20461	2.56898	2.45314	6.24664	5.13389	6.00091	5.75809	3.38711	6.53024	1.84977	3.45518	5.85002
TCGA_TCGA-DU-8162	5.70463	2.63428	2.29395	2.21288	4.7567	4.11487	2.31419	2.73118	6.34092	5.34908	6.34475	5.82376	3.95766	6.68144	1.88717	3.86532	5.92328
TCGA_TCGA-HT-7873	6.3652	3.24202	1.7562	3.19202	5.50635	4.8772	3.26268	3.4583	6.04483	5.2246	6.35392	5.66868	4.5764	4.57807	2.88159	4.48311	6.39454
TCGA_TCGA-DU-A5TR	5.12272	3.38624	0.718575	1.647	3.58633	4.4847	2.02563	2.72579	5.12644	3.00809	5.04645	4.41872	2.92861	3.53118	4.04054	2.46909	5.18909
TCGA_TCGA-12-0616	5.75068	2.06187	1.06583	2.34415	5.67414	5.01439	2.46683	3.79462	5.76786	4.43904	5.48953	5.8759	2.87374	3.84913	8.07932	3.38842	5.99122
TCGA_TCGA-S9-A6U8	6.1106	4.14012	1.89627	2.75084	4.53289	4.61715	2.73762	3.15638	5.71304	4.62508	5.6205	5.7429	4.19251	4.12307	3.01654	3.81065	5.92938
TCGA_TCGA-HT-7854	6.48015	3.98248	1.72698	2.74609	5.45095	4.62492	2.934	3.51766	5.86063	4.94846	5.19905	5.44804	4.81344	4.35325	2.27624	4.37374	5.96306
TCGA_TCGA-HT-7476	5.14316	2.26879	1.63966	1.73837	4.55119	3.81562	2.091	2.5427	5.7217	4.55073	5.49644	5.41845	3.03461	5.04193	1.03676	3.11344	5.68263
TCGA_TCGA-06-0152	6.38927	3.45188	1.8471	2.74521	6.28206	4.90142	2.53066	3.41733	6.59344	5.35416	5.94742	5.70378	4.17375	5.02305	1.44125	3.55317	6.70197
TCGA_TCGA-HT-8011	6.39294	1.83582	2.07695	2.96405	6.45418	5.15767	2.75568	3.47899	7.21419	5.6369	6.06602	5.86872	4.02966	4.89394	1.14644	4.10275	6.63685
TCGA_TCGA-DU-A5TS	5.22849	2.3694	0.902772	1.61256	3.5888	3.9789	2.5471	3.03233	4.87134	3.29052	4.70274	4.78825	3.01967	3.53131	3.56811	2.88206	5.36963
TCGA_TCGA-E1-A7YS	6.78844	1.46805	2.29147	3.57925	5.17774	5.00927	3.20976	3.53108	6.21469	5.3516	6.13131	6.04896	3.99039	4.68513	2.01977	3.77388	5.75154
TCGA_TCGA-TQ-A7RN	5.96757	2.01052	2.26599	2.52201	5.30136	4.32483	2.95559	3.27793	6.2804	5.10214	6.02791	5.84599	3.52379	3.96681	2.96458	3.38209	5.95882
TCGA_TCGA-TQ-A7RR	6.05306	3.36919	1.52686	2.74828	4.95179	4.56693	3.00702	3.58021	5.90955	4.77424	5.62988	5.72669	4.1913	4.62915	4.0323	3.73907	5.89469
TCGA_TCGA-S9-A7J2	5.85669	2.35222	2.51318	2.29484	5.15266	4.19597	3.29364	3.2546	6.04622	4.91815	6.12893	5.48929	3.48012	3.76329	3.00445	3.18317	6.2435
TCGA_TCGA-CS-5395	6.72264	2.68488	1.78455	2.53459	6.03095	4.89516	2.64438	3.05977	6.69617	5.33198	5.62241	5.40631	4.50967	4.07773	0.595718	4.62879	6.14261
TCGA_TCGA-02-2486	6.51518	3.41412	0.778049	2.39219	5.64633	5.3212	2.8122	4.49846	6.11541	5.11632	5.2914	5.20406	3.68868	3.94523	1.40366	2.9386	6.30488
TCGA_TCGA-19-2620	5.85067	2.32033	1.18777	2.32906	5.0058	4.92737	2.4844	3.30125	5.3218	4.76796	5.46867	5.50202	3.4314	3.6167	1.71242	3.42724	6.08017
TCGA_TCGA-14-1829	6.19727	1.87819	0.451283	2.23933	5.91324	5.69601	3.23964	4.59284	5.84116	4.48468	4.08402	6.14233	1.87184	4.14472	1.55966	3.68524	5.62137
TCGA_TCGA-HT-7689	6.7669	3.24895	1.43523	2.84037	4.61147	4.84677	2.89604	3.57563	6.38675	4.98874	5.55823	5.96597	4.58585	4.274	2.77519	4.01568	5.72292
TCGA_TCGA-FG-6688	6.5241	3.24496	1.00748	2.16704	5.23189	4.82229	2.44233	3.18898	6.22979	4.53158	5.25518	5.05394	4.11222	3.46979	4.53425	3.49196	5.62907
TCGA_TCGA-HW-7495	6.06678	2.18442	2.33233	2.49202	4.98344	4.36522	2.87628	3.31002	6.35242	5.11877	5.68178	5.65798	4.0446	5.24687	2.68261	3.62301	6.0804
TCGA_TCGA-R8-A6ML	6.0256	0.342942	2.24881	2.21931	4.96045	4.41612	3.01043	3.41262	5.95629	4.54307	5.83061	5.82762	3.41312	3.64351	4.31513	3.03647	5.94848
TCGA_TCGA-DB-5281	6.31184	2.40091	2.13767	2.76455	5.14513	4.45343	2.71341	3.47981	6.34371	5.67623	5.72537	5.80598	4.52762	5.51026	1.23437	4.03686	6.53883
TCGA_TCGA-VW-A7QS	6.62252	0.980271	1.69413	2.42466	5.73011	4.6696	3.19968	3.57879	6.88801	5.27971	6.48675	5.82377	3.22062	4.29309	4.96452	2.87433	5.62937
TCGA_TCGA-HT-A4DV	6.07679	2.42374	1.76076	2.02135	4.31355	4.33039	3.07779	3.23729	5.58971	4.15242	5.68883	5.74719	3.78293	4.64992	3.27502	3.22964	5.84337
TCGA_TCGA-TM-A84H	6.09223	3.23016	1.82256	2.87576	4.58927	4.59795	3.18382	3.32713	6.04367	4.70492	5.77054	4.78972	4.47562	4.37163	3.06178	4.26669	6.17046
TCGA_TCGA-TM-A7CA	5.50462	2.41928	1.55675	2.57252	4.46426	4.5332	2.27134	2.99713	6.10514	4.53198	5.59564	5.54163	3.97303	4.35433	2.32381	3.71331	5.70221
TCGA_TCGA-TQ-A7RJ	5.76515	3.21222	2.08821	2.26519	4.5147	4.59942	2.63907	3.2132	5.97486	4.84985	6.09668	5.60636	4.21419	4.39041	3.16065	3.79739	6.0704
TCGA_TCGA-DH-5142	6.40477	3.55539	0.959428	2.35157	5.33548	5.02118	2.74801	3.79545	6.04949	5.16721	5.12948	5.8989	4.10832	4.10733	2.15163	3.64885	6.00007
TCGA_TCGA-DB-A64X	5.72197	1.78352	1.1411	1.67401	4.01103	4.46911	2.50115	3.41454	5.8978	4.06658	5.58881	5.46701	3.2407	4.19188	3.61511	3.4562	5.83162
TCGA_TCGA-DU-A76R	6.23434	1.85395	2.01687	2.22291	5.26311	4.51682	2.74464	3.60244	6.41762	5.06232	6.16208	5.53576	3.41207	4.37054	3.00616	3.24192	5.93441
TCGA_TCGA-S9-A7QX	5.64643	3.36674	1.63278	2.21992	4.51686	4.06483	2.62526	3.29297	5.66263	4.50355	5.89969	5.40557	3.71754	3.94386	1.33921	3.52887	5.17364
TCGA_TCGA-26-5134	5.28659	1.7298	1.15092	2.88965	4.64391	4.59319	1.90081	3.57576	5.14316	4.19448	5.74632	5.32691	3.37568	4.26205	1.771	2.97015	4.97166
TCGA_TCGA-41-2571	5.40779	2.35917	1.83204	2.5265	5.40173	4.61059	2.72617	3.46974	5.74492	4.14374	5.32517	5.47651	3.41756	3.64682	5.94952	3.08715	6.37748
TCGA_TCGA-HT-A615	6.39941	3.01539	1.57216	2.73328	5.32875	4.56472	2.98396	3.69896	6.40486	5.05779	5.86955	6.06632	3.41681	4.4483	3.37714	3.29379	5.49662
TCGA_TCGA-41-2572	5.73913	1.79072	1.00526	2.09755	4.66104	5.37962	2.56193	3.4025	6.38813	4.88248	5.63868	5.54882	3.04748	4.56157	1.4521	3.12219	6.59362
TCGA_TCGA-DU-7012	7.03342	4.34958	1.12991	3.27364	6.06889	5.21481	2.6519	3.68798	6.7253	5.18332	5.14671	5.47403	4.89883	4.67922	0.893733	3.95397	5.6587
TCGA_TCGA-P5-A5F1	6.3705	2.67021	1.33248	1.90983	4.3439	5.18743	3.01784	3.83538	6.41036	4.40673	5.68627	5.65969	3.68325	3.4022	4.29688	3.98072	5.99505
TCGA_TCGA-HT-7477	5.86608	2.23995	1.29432	3.17925	5.79091	4.38513	3.43879	2.79828	6.22298	4.78031	5.4516	5.65882	4.07037	4.53934	3.01118	3.77351	6.25476
TCGA_TCGA-HT-8109	5.99077	2.74527	2.08502	2.72025	5.10012	4.25752	2.72775	2.80467	6.18035	5.3751	5.8567	5.56513	3.75524	5.71682	2.14373	3.78051	5.83265
TCGA_TCGA-26-5139	6.60399	2.71603	1.18856	2.43244	5.52405	5.38895	2.37753	3.2514	6.48685	5.23916	5.77291	5.77344	3.83198	4.53738	1.13577	3.44428	6.54398
TCGA_TCGA-06-0141	5.55322	2.52494	0.664275	2.03366	5.16072	4.96088	2.72176	3.23224	6.55792	4.43089	4.81865	5.46186	2.84107	3.94924	1.37948	2.99326	5.4811
TCGA_TCGA-R8-A73M	5.54936	1.69121	1.47005	1.43923	4.28516	4.58394	2.77642	3.47963	5.83119	3.69973	6.29431	6.16115	2.19355	3.58694	2.31087	2.31685	4.91491
TCGA_TCGA-HW-A5KM	6.38417	4.87957	1.41517	3.15943	5.59957	4.99659	2.30517	3.39824	6.09964	4.81396	5.50528	5.54197	4.28721	4.57993	3.7323	3.94945	6.17548
TCGA_TCGA-S9-A7R3	5.88655	2.89513	2.04146	2.34704	4.51181	4.92452	2.79022	3.34283	5.83211	4.33295	5.68533	5.58523	4.2581	3.58026	2.42529	3.69212	5.41955
TCGA_TCGA-TQ-A7RU	6.12799	1.28481	2.33088	2.50687	5.05328	4.20656	3.11581	3.30859	6.24117	4.63849	5.88039	5.84331	3.34533	3.5946	3.58413	3.01949	6.24632
TCGA_TCGA-S9-A6TY	5.80086	1.40767	1.55291	2.15144	4.61709	4.10328	2.99382	3.16049	6.45255	5.26696	6.04141	5.76928	2.99507	4.79151	2.00543	3.17489	5.91233
TCGA_TCGA-HT-7473	6.66372	3.98914	1.2723	2.91779	5.28845	4.82267	2.8693	3.49661	6.19267	4.90537	5.34901	5.15815	4.69742	3.8601	2.86054	4.19738	5.87717
TCGA_TCGA-DU-8167	6.0564	3.59319	1.11532	2.41821	4.25594	4.4587	2.59783	3.51821	5.78387	4.31699	4.80108	5.55923	3.83288	4.11192	3.22827	3.3189	5.89531
TCGA_TCGA-06-5856	6.59222	2.84935	1.23961	2.7684	6.04558	4.71858	2.92191	3.90968	6.7728	5.17517	6.79818	6.07226	3.86455	4.21225	6.49491	4.06814	6.37241
TCGA_TCGA-HT-8111	6.0968	4.45849	1.8149	2.64764	4.99308	4.54811	2.76701	2.81819	6.02412	4.80377	5.63788	5.75633	4.25947	3.90412	3.6418	3.68494	6.31845
TCGA_TCGA-S9-A89Z	6.21058	3.53619	1.09774	3.02111	4.95569	5.10247	2.55987	3.59544	5.99447	4.94983	6.08519	5.67295	4.06991	4.59082	1.30122	3.16038	6.26703
TCGA_TCGA-HT-7470	5.95197	2.99581	1.55682	2.34313	4.80274	4.58583	2.23993	2.51081	6.06169	5.04292	5.48366	5.54882	4.16188	5.25381	1.67039	3.86235	5.81041
TCGA_TCGA-DU-6402	6.74052	2.59893	1.42405	2.49142	5.29318	5.14562	2.17134	3.04453	6.70287	5.4267	5.63094	5.76268	4.14226	3.6632	0.87702	3.05098	6.59259
TCGA_TCGA-QH-A6X8	5.69876	2.04905	1.50145	1.93629	4.83787	4.19718	2.68561	3.09094	5.81842	4.4815	5.97777	6.00728	3.2447	3.4379	1.96521	2.88446	5.92534
TCGA_TCGA-DU-A5TY	6.27915	2.71431	0.966934	2.78782	5.35584	5.15774	2.81331	3.71387	5.74872	4.80756	5.45222	5.26207	3.72883	4.67004	5.86612	3.70563	5.8689
TCGA_TCGA-DU-8163	6.18581	4.21083	1.64235	3.03995	5.15207	4.72316	2.55269	3.23745	6.39866	5.01774	5.42194	5.77718	4.34686	3.98103	2.26596	3.9862	6.02426
TCGA_TCGA-DU-A7TD	6.64423	3.41328	1.62167	3.06635	5.01341	4.88775	2.91867	3.47973	6.73781	5.21523	5.50746	5.39522	4.32807	5.01664	1.10585	3.81011	6.24754
GSE43378_GSM1061661	5.87165	3.23314	2.13185	2.10968	4.43574	4.25022	3.21631	3.62892	6.43186	4.39503	5.97664	5.87249	4.19444	4.53229	4.03456	3.47719	6.71326
GSE43378_GSM1061662	5.86292	3.77284	0.93125	2.47219	5.93885	5.24684	2.38385	2.93266	5.7935	5.35011	5.6361	5.49292	3.34998	4.56386	3.82793	2.62825	5.86735
GSE43378_GSM1061663	5.56308	2.54349	2.12997	1.81928	3.59222	4.37859	3.14227	3.71775	6.6322	4.96621	6.28012	6.05856	3.76041	4.63791	3.6231	4.04684	6.51675
GSE43378_GSM1061664	5.91613	2.59952	1.483	2.11738	4.78851	3.97975	2.44231	2.84453	5.75676	4.20171	6.3425	5.45335	3.83036	4.68263	2.21348	2.85781	6.38673
GSE43378_GSM1061665	5.81782	2.92671	2.03554	2.10479	4.47545	3.5571	2.09465	1.61788	5.46915	4.35779	6.28917	5.04708	4.1454	3.67039	5.35804	3.15054	6.14182
GSE43378_GSM1061666	6.02558	3.95717	1.50641	2.34608	5.80741	4.93691	2.34227	2.8354	5.56183	5.22537	5.5531	5.53285	3.79261	4.88192	3.40516	3.44295	5.90381
GSE43378_GSM1061667	5.89199	1.70026	1.76586	2.27965	5.21893	3.82388	3.03089	3.38853	6.09696	5.08168	6.11588	5.82773	3.31568	3.46017	3.37805	2.97058	6.54426
GSE43378_GSM1061668	4.7795	2.60473	2.14966	1.53217	4.34834	4.14551	2.92851	3.06786	6.37952	5.57776	6.42829	6.11756	3.36297	5.84067	2.59068	4.06488	5.77829
GSE43378_GSM1061669	5.9981	2.36033	1.63499	1.06137	4.73666	4.85353	2.84873	3.41099	6.1442	5.0296	5.78855	5.93992	4.0409	5.48138	3.57869	3.27651	6.55068
GSE43378_GSM1061670	5.6092	3.51982	2.12411	1.94857	4.6658	4.63841	3.08183	3.61472	6.46067	5.24592	6.22055	6.0212	4.06868	5.17004	3.75071	4.04481	6.31459
GSE43378_GSM1061671	4.87823	1.48051	1.62908	2.07748	5.8793	5.03905	2.60636	2.81578	6.2817	5.65728	5.33328	5.78697	3.10714	4.85185	3.49724	3.41662	6.14703
GSE43378_GSM1061672	6.03167	1.37041	1.74845	2.88548	5.19746	4.92222	2.77317	3.64745	6.40953	5.33686	5.74631	5.65154	4.06426	3.86622	1.90501	3.80898	6.28792
GSE43378_GSM1061673	6.2193	1.73903	1.49019	3.11248	5.02284	5.61296	2.8717	3.6956	5.69566	5.94184	5.49686	5.51286	4.25298	5.03339	0.271172	3.95735	5.4834
GSE43378_GSM1061674	6.42397	3.52022	0.650646	3.36722	5.89921	4.50643	1.92616	3.05687	5.40814	5.15719	5.2252	5.27004	4.20186	4.54679	6.68959	3.84967	5.24108
GSE43378_GSM1061675	6.46913	1.80549	1.61656	2.22237	5.37268	5.14783	2.69451	3.43359	6.74721	5.31925	5.78749	5.81411	3.63085	3.10453	1.82999	4.11436	5.38545
GSE43378_GSM1061676	6.57683	3.30707	1.56688	2.85791	4.94876	4.97735	2.57505	3.3841	6.48558	5.23181	5.31854	5.60851	3.53523	4.74881	1.93039	3.93027	5.70817
GSE43378_GSM1061677	6.3023	3.13374	1.31392	3.13247	4.54248	4.16082	2.64086	3.34242	5.33609	3.43872	5.67197	5.66567	4.81726	4.10063	2.24449	3.37739	5.93704
GSE43378_GSM1061678	6.12343	3.72397	1.23936	3.07572	5.29707	4.95612	2.51943	3.09486	6.13373	4.96641	5.32034	5.47875	3.59101	4.25801	4.24752	3.61005	6.00312
GSE43378_GSM1061679	6.60226	2.44054	1.24537	2.92109	4.62169	4.81587	2.69255	4.00683	5.62732	4.95528	5.84081	5.49984	4.48256	5.09539	5.31161	3.86272	5.25673
GSE43378_GSM1061680	6.75094	2.68264	1.2001	2.45264	5.62394	4.9336	2.40089	3.62821	6.66582	5.26415	5.51147	5.85891	3.81764	4.20397	3.24532	3.62187	5.07448
GSE43378_GSM1061681	6.70982	2.34689	1.30782	1.98159	5.17337	4.45326	2.35968	2.69364	5.89612	4.43691	6.14985	5.30982	3.8372	4.30891	2.68437	3.28578	5.61511
GSE43378_GSM1061682	6.60294	3.6686	1.20248	3.01318	5.58664	4.85234	2.16569	3.23948	5.44032	4.32683	5.34143	5.54799	3.66336	4.02639	3.75255	2.72275	5.01278
GSE43378_GSM1061683	6.61242	1.67852	0.0855739	3.20746	5.19615	4.01099	2.69209	2.73414	5.74227	4.27569	5.7093	4.49679	3.77731	3.81385	0.939457	3.36474	5.94855
GSE43378_GSM1061684	5.99451	1.96162	2.15365	1.87614	4.92486	4.75549	2.69367	3.70954	6.75411	5.37995	6.15889	5.30982	3.74788	4.32071	3.20722	3.87078	5.65876
GSE43378_GSM1061685	5.81782	2.04882	2.37046	1.84727	4.46481	4.50935	2.92485	3.75452	6.60361	4.86769	6.08204	6.04859	3.05501	3.83877	2.49087	3.77238	6.17691
GSE43378_GSM1061686	6.20269	2.49114	1.98614	2.43726	4.59329	4.87985	2.54155	3.5636	6.34216	4.58753	6.03284	6.02645	3.74524	5.27674	2.27243	3.84176	5.75518
GSE43378_GSM1061687	5.23795	2.33742	2.27815	1.73403	4.5255	4.64499	2.76581	3.25281	6.29124	4.75976	6.10692	5.81152	3.43433	5.20345	0.993198	3.82682	6.03446
GSE43378_GSM1061688	6.38572	4.10719	1.14104	2.56385	5.04861	5.16472	2.78932	3.41566	6.98017	5.26612	5.403	5.68389	3.71107	5.04885	0.941585	3.28444	5.89259
GSE43378_GSM1061689	5.37779	1.02373	1.90472	2.52343	5.21067	4.45562	2.35897	3.53975	6.66194	5.18196	6.4432	5.77891	2.60633	3.9984	3.51634	2.9613	5.77851
GSE43378_GSM1061690	5.70129	3.73782	1.68573	2.81099	4.57245	4.68544	2.63235	3.5939	5.96094	4.26764	5.79674	5.26159	4.2149	3.7296	4.02606	3.46418	6.27748
GSE43378_GSM1061691	6.12642	2.48735	1.32596	2.70424	5.02158	4.61902	2.71316	3.38047	6.24447	5.40137	6.19525	5.37261	3.49571	4.48949	4.56248	3.50362	5.78531
GSE43378_GSM1061692	5.51433	2.59412	1.19748	3.07938	4.17564	5.17839	2.74161	3.87512	6.2954	4.26267	5.81125	5.83203	3.88823	4.77281	2.97857	3.94959	5.93672
GSE43378_GSM1061693	5.22377	2.51449	1.90117	2.16949	4.67663	5.25773	2.8582	3.58556	5.72661	4.16093	5.79065	5.80489	4.31005	4.16788	2.06325	4.09563	5.96069
GSE43378_GSM1061694	5.59849	2.16537	1.57827	2.4904	4.98962	4.27168	2.86133	3.1167	5.41338	3.73762	5.8332	5.91033	4.59547	3.20632	5.64489	2.93105	5.81446
GSE43378_GSM1061695	6.50138	1.64986	1.85343	2.95856	5.4986	4.42768	3.07928	3.40309	6.20514	4.71141	5.76812	5.76257	3.19609	3.9251	0.33502	3.25562	6.13358
GSE43378_GSM1061696	6.94852	2.26448	1.5709	2.86331	5.18766	5.08359	2.28779	3.49243	6.16311	4.56135	5.40695	5.63016	3.68371	3.64618	1.85921	2.83478	6.37062
GSE43378_GSM1061697	5.69134	3.16412	1.72092	1.78347	4.26732	4.59369	3.20153	3.67377	6.38346	4.24863	6.04804	5.62165	3.94574	4.06353	3.58969	4.42492	6.12525
GSE43378_GSM1061698	6.5493	2.81993	1.86123	2.87499	4.9186	4.96635	3.04112	3.61998	6.28076	4.1727	5.52057	5.29361	4.10188	3.96545	2.77181	3.93697	5.94605
GSE43378_GSM1061699	6.7118	4.14307	1.72124	2.55526	5.96961	5.0077	2.03447	3.32044	5.7058	4.62879	5.34403	5.37415	3.55647	3.56311	3.39097	3.47471	5.94671
GSE43378_GSM1061700	6.06841	2.2037	1.48225	1.97989	5.54128	4.48425	2.73915	3.572	5.75676	4.49932	5.24711	5.67762	3.38387	3.73249	0.469563	3.79685	5.48482
GSE43378_GSM1061701	5.98613	1.70086	2.00647	2.60409	5.23242	4.40826	3.06818	2.82591	6.82754	5.24226	5.99004	5.59366	2.72101	5.37135	3.07399	3.01441	6.0694
GSE43378_GSM1061702	6.54375	2.5632	1.40831	2.93428	5.73514	5.07762	2.71933	3.57779	6.77281	4.98427	5.57904	5.64964	3.66945	4.39856	1.09883	3.9876	6.03268
GSE43378_GSM1061703	5.37451	3.47158	1.63025	2.28717	5.07191	4.89732	2.52492	3.07138	6.65496	5.50892	5.42235	5.51286	3.10555	3.88225	0.513099	3.87711	6.46974
GSE43378_GSM1061704	6.00474	1.4573	1.87789	2.35258	4.86376	4.90509	2.79942	3.07894	6.00971	5.2379	6.09182	5.54656	3.44926	4.58321	4.05567	3.95031	6.32161
GSE43378_GSM1061705	6.6962	2.16949	1.07086	2.32387	4.51331	5.08181	3.22374	3.16679	5.84993	5.15492	5.64945	5.46585	3.88468	3.85925	1.8658	3.669	5.91208
GSE43378_GSM1061706	6.3408	1.90163	2.06941	2.1099	4.88741	4.30257	2.72307	3.31429	6.18697	4.62783	5.94676	5.81855	3.85439	3.24402	3.17457	3.52696	6.81756
GSE43378_GSM1061707	6.0116	2.22799	0.989541	2.32199	4.58709	4.05618	2.45584	3.17861	6.0943	4.96278	5.93918	5.98334	4.15772	3.90949	2.05132	3.16426	6.29519
GSE43378_GSM1061708	6.59558	3.40003	1.6267	3.02689	5.14579	5.00099	2.65655	2.96644	6.43093	4.41475	5.46425	5.48543	4.1161	4.84936	3.83095	3.76967	6.40643
GSE43378_GSM1061709	5.7384	5.14649	1.23652	3.23477	6.49241	5.45728	1.48894	2.93142	5.65276	4.81771	5.19633	5.60438	3.49686	4.02905	2.99136	2.96164	6.72164
GSE43378_GSM1061710	5.8253	2.10081	0.513175	1.93469	5.77701	4.75549	1.95902	3.36025	5.59307	4.74926	5.2757	5.60851	3.41788	4.31377	5.52496	3.67005	6.07895

## Sheet: S4
id	HR	HR.95L	HR.95H	pvalue	km
NFE2L2	2.50416	1.94781	3.21941	8.01142e-13	7.17426e-13
NLRP3	1.07684	0.949652	1.22106	0.248331	0.0152639
ATP7B	0.279456	0.214127	0.364717	6.34383e-21	0
ATP7A	1.75586	1.40562	2.19336	7.06649e-07	1.82834e-06
SLC31A1	3.24562	2.59718	4.05596	4.058e-25	0
FDX1	3.7708	2.88065	4.93602	4.41333e-22	0
LIAS	0.671104	0.47753	0.943146	0.0216133	0.000554838
LIPT1	2.6376	1.9811	3.51165	3.10472e-11	4.79394e-12
DLD	1.83573	1.39505	2.41562	1.44425e-05	9.2387e-08
DLAT	1.54349	1.21251	1.96481	0.000423784	0.000271865
PDHA1	0.638336	0.475477	0.856975	0.00281715	4.72263e-06
PDHB	0.964435	0.671951	1.38423	0.844285	0.0921023
MTF1	1.02575	0.829017	1.26916	0.81499	0.110688
GLS	1.01467	0.873351	1.17886	0.84903	0.000344838
CDKN2A	1.01288	0.936171	1.09588	0.750052	6.66134e-16
DBT	0.94302	0.734223	1.2112	0.645919	0.082635
DLST	2.0235	1.51167	2.70863	2.16676e-06	9.71212e-12

## Sheet: S5
id	coef
NBPF8	0.294251
TSKU	0.312598
AURKB	0.150299
SLC25A43	0.28976
P2RY6	0.273069
STEAP1	0.149641
CDK4	0.125222
RARRES1	0.136088
KCNN4	0.16706
NOG	-0.288455
MKX	-0.204536
